# Supplementary material
Source: PubMed Central journal article supplement (PMC3349818)

# Supporting Information

## Lead optimization of 3-carboxyl-4(1H)-quinolones to deliver orally bioavailable antimalarials

*Yiqun Zhang<sup>1</sup>, Julie A Clark<sup>1</sup>, Michele C. Connelly<sup>1</sup>, Fangyi Zhu<sup>1</sup>, Jaeki Min<sup>1</sup>, W. Armand Guiguemde<sup>1</sup>, Anupam Pradhan<sup>2</sup>, Lalitha Iyer<sup>3</sup>, Anna Furimsky<sup>3</sup>, Jason Gow<sup>3</sup>, Toufan Parman<sup>3</sup>, Farah El Mazouni<sup>4</sup>, Margaret A. Phillips<sup>4</sup>, Dennis E. Kyle<sup>2</sup>, Jon Mirsalis<sup>3</sup>, and R. Kiplin Guy<sup>1\*</sup>*

<sup>1</sup> Department of Chemical Biology and Therapeutics, St Jude Children's Research Hospital, 262 Danny Thomas Place, Memphis, TN 38105, United States

<sup>2</sup> College of Public Health, University of South Florida, 13201 Bruce B. Downs Boulevard, MDC 56, Tampa, FL 33612, United States

<sup>3</sup> SRI International, 333 Ravenswood Avenue, Menlo Park, California 94025, United States

<sup>4</sup> UT Southwestern Medical Center at Dallas, 6001 Forest Park, Dallas, Texas 75390, United States

### Table of Contents

|                                                                                                                                     |           |
|-------------------------------------------------------------------------------------------------------------------------------------|-----------|
| <b>Chemistry Procedures and Tabulated Data</b>                                                                                      | <b>3</b>  |
| <b>Table S1. SAR of 7-Methoxy 4(1H)-quinolone derivatives 8a-aa</b>                                                                 | <b>17</b> |
| <b>Table S2. SAR of 4(1H)-quinolone derivatives 9-14</b>                                                                            | <b>19</b> |
| <b>Table S3. SAR of 4(1H)-quinolone derivatives 15-20</b>                                                                           | <b>20</b> |
| <b>Table S4. SAR of 4(1H)-quinolone derivatives 27-28</b>                                                                           | <b>23</b> |
| <b>Figure S1. Heat map for Antimalarial activity, permeability and solubility of quinolone derivatives 8-20 and 27-28</b>           | <b>25</b> |
| <b>Table S5. PfDHOD inhibition assay.</b>                                                                                           | <b>28</b> |
| <b>Table S6. Plasma concentration of 20i in mouse after a single oral administration</b>                                            | <b>28</b> |
| <b>Table S7. Plasma concentration of 20g in mouse after a single oral administration</b>                                            | <b>29</b> |
| <b>Table S8. Plasma concentration of 20h in mouse after a single oral administration</b>                                            | <b>29</b> |
| <b>Table S9. Pharmacokinetic profiles of 8a, 8e, 8f, 8g, 8h, 8m, 20i, 20g, and 20h in mouse after a single oral administration.</b> | <b>30</b> |

|                                                                                                                                                   |           |
|---------------------------------------------------------------------------------------------------------------------------------------------------|-----------|
| <b>Table S11. Hammett Constants Used in Study.</b>                                                                                                | <b>31</b> |
| <b>Table S12. Hansch Constants Used in Study.</b>                                                                                                 | <b>32</b> |
| <b>Figure S2. Experimental solubility vs predicted solubility of quinolone derivative following Yalkowsky and Banerjee's solubility equation.</b> | <b>33</b> |

## Chemistry Procedures and Tabulated Data

**General Consideration.** 3,4-Methylenedioxyphenyl boronic acid was bought from Boron Molecular, and other chemical reagents were from Acros, Aldrich, and Combi-Blocks. All materials were obtained from commercial suppliers and used without further purification. Thin layer chromatography was performed using silica gel 60 F254 plate from EMD. Purification of compounds was done by normal phase column chromatography (Biotage SP1). <sup>1</sup>H NMR, <sup>13</sup>C NMR spectra were recorded on a Bruker 400 MHz, chemical shifts were expressed in ppm relative to TMS used as an internal standard. Purity was estimated by chromatographic methods using an HPLC-MS (photodiode array, total ion count, and expected mass [m/z]) was obtained (Alliance HT, Micromass ZQ 4000 and RP-C18 Xterra column 5 μm, 6 mm × 50 mm [Waters]) or UPLC-MS (Acquity PDA detector, Acquity SQ detector and Acquity UPLC BEH-C18 column 1.7 μm, 2.1 × 50 mm [Waters]). FT-IR was recorded on a Thermo Nicolet IR 100 FTIR. Compounds prepared in our laboratory were in 85-98% purity.

**General procedure for synthesis of 8-13, 15-20.** Quinolone derivatives **8-20** were synthesized as previous described,<sup>12</sup> except 7-methylthio quinolone derivatives **14**. Briefly, the intermediate 4(1H)-quinolone **6** were prepared from appropriate aniline **5** (15 mL) and 2-(ethoxymethylene)malonate (16.5 mmol), followed by Gould-Jacobs cyclization. Then, to the solution of **6** (6.5 mmol) in 6 mL 1,4-dioxane was added POCl<sub>3</sub> (7.8 mmol). The mixture was stirred at 120 °C for 1 hour. After cooling to room temperature, the reaction mixture was poured into ice water and then neutralized by aqueous K<sub>2</sub>CO<sub>3</sub>. The resulting 4-chloro quinoline derivatives were extracted by CH<sub>2</sub>Cl<sub>2</sub>, which were used for next step without purification. 4-Chloro quinoline derivatives were then treated with m-chloroperbenzoic acid (7.8 mmol) in 30 mL of CHCl<sub>3</sub> at room temperature for 4 hours to afford N-oxide 4-chloro-quinoline intermediate which then reacted with POBr<sub>3</sub> (7.2 mmol) in 30 mL CHCl<sub>3</sub> at room temperature for 1 hour. The crude mixture was quenched by adding ice water and then neutralized by aqueous K<sub>2</sub>CO<sub>3</sub>. 2-Bromo-4-chloro-quinoline derivatives **7** were then extracted by CH<sub>2</sub>Cl<sub>2</sub> and purified by flash chromatography.

The flask was charged with 2-bromo-4-chloro quinoline intermediate **7** (0.3 mmol), appropriate boronic acid (0.31 mmol), Pd(PPh<sub>3</sub>)<sub>4</sub> (8.6 mg, 0.0075 mmol) in 2 mL of 1,4-dioxane. The flask was degassed three times. To the mixture was added the solution of CsCO<sub>3</sub> (0.195 g, 0.6 mmol) in 0.6 mL of H<sub>2</sub>O. The flask was degassed again three times. The reaction mixture was stirred at 75 °C for 3 h. After being cooled to rt, the bottom aqueous layer was removed, and the organic layer was concentrated and purified by flash column chromatography to produce the intermediate compound ethyl 2-aryl-4-chloroquinoline-3-carboxylate.

The solution of ethyl 2-aryl-4-chloroquinoline-3-carboxylate intermediate (0.2 mmol) in 1 mL of AcOH/H<sub>2</sub>O (9:1) was refluxed at 120 °C for 1 h. The reaction mixture was concentrated and neutralized by adding 5 drops of NH<sub>4</sub>OH. Purification was performed by reverse-phase HPLC to produce the desired compounds **8-13, 15-20** (yields 10-77%). (Waters Xterra preparative C<sub>18</sub> column, MeOH/H<sub>2</sub>O, 10mM NH<sub>4</sub>HCO<sub>3</sub>).

### General procedure for synthesis of 14.

Quinolone derivative **14** were synthesized as previous described with minor modification.<sup>34</sup> To the solution of benzoyl chloride **22** (6.70 mmol) was added the solution of 3-methylthio Aniline **21** (8.04 mmol) in 10 mL toluene dropwise. After the reaction mixture was stirred at room temperature for 3 hours, solvents were evaporated to afford the crude amide product **23**, which was purified by flash column chromatography. Then, the amide **23** (4 mmol) in 10 mL of 1,4-dioxane was treated with PCl<sub>5</sub> (4 mmol). After refluxing at 110 ° for 1 hour, the solvent of the reaction mixture was evaporated under vacuum. The residues were re-dissolved in 5 mL of toluene and dropped into the solution of refresh prepared sodium diethyl malonate in 10 mL of toluene. The mixture was then refluxed at 110 ° for 6 hours. The crude product **24** was purified by flash column chromatography. The compound **14** was prepared by the cyclization of **24** (0.7 mmol) in 1 mL of Ph<sub>2</sub>O under 170 °C for 4 hours. The reverse-phase HPLC was used to purify the desired compound **14** (total yield over 4 steps 4.9%).

### General procedure for synthesis of 27-28.

To the solution of KOH (12 mmol) in 10 mL of water and 0.5 mL of EtOH was added quinolone ester **25**. After stirring at 75°C for 40 hours, the reaction mixture was cooled to room temperature and neutralized by adding 2N HCl until pH reached to 7. The white solids were collected by filtration and washed by water twice. This crude product **26** was used for the next step without purification. Then, to the mixture of acid **26** (0.05 mmol) in 0.5 mL of DMF was added DPIEA (0.075 mmol) and HBTU (0.05 mmol). The mixture was stirred at rt for 30 min. After stirring at room temperature for 30 mins, appropriate alkyl alcohol or alkyl amine (0.150 mmol) was added into the reaction mixture. The mixture continued to stir at 40 °C for 2 hours. After the solvent was evaporated, the crude product **27-28** was purified by reverse-phase HPLC (yields 32-77%).

**Ethyl 7-methoxy-4-oxo-2-(3-vinylphenyl)-1,4-dihydroquinoline-3-carboxylate 8d.** 48% yield from intermediate **7**, <sup>1</sup>H NMR (400 MHz, MeOD) δ 8.18 (d, *J* = 9.5 Hz, 1H), 7.64 (d, *J* = 9.0 Hz, 1H), 7.59 – 7.43 (m, 1H), 7.10 – 7.01 (m, 1H), 6.82 (dd, *J* = 17.6, 11.0 Hz, 1H), 5.90 (d, *J* = 17.7 Hz, 1H), 5.36 (d, *J* = 11.0 Hz, 1H), 4.05 (q, *J* = 7.2 Hz, 1H), 3.92 (s, 1H), 0.97 (t, *J* = 7.2 Hz, 1H). <sup>13</sup>C NMR (101 MHz, MeOD) δ 176.58, 168.47, 165.18, 152.25, 143.06, 139.72, 137.17, 135.76, 130.19, 129.26, 128.58, 128.25, 126.98, 120.29, 116.69, 116.46, 115.90, 101.43, 100.26, 62.23, 56.30, 14.09. MS (ESI) calcd C<sub>21</sub>H<sub>19</sub>NO<sub>4</sub> for [M+H]<sup>+</sup>, 350.13, found 350.21

**Ethyl 2-([1,1'-biphenyl]-3-yl)-7-methoxy-4-oxo-1,4-dihydroquinoline-3-carboxylate 8e.** 56% yield from intermediate **7**, <sup>1</sup>H NMR (400 MHz, MeOD) δ 8.22 (d, *J* = 9.0 Hz, 1H), 7.90 (s, 1H), 7.79 – 7.59 (m, 2H), 7.54 (t, *J* = 7.6 Hz, 1H), 7.46 (d, *J* = 7.3 Hz, 1H), 7.17 – 7.09 (m, 1H), 4.10 (q, *J* = 7.2 Hz, 1H), 3.97 (s, 1H), 1.00 (t, *J* = 7.2 Hz, 1H). <sup>13</sup>C NMR (101 MHz, MeOD) δ 176.34, 168.38, 165.05, 151.97, 143.19, 143.02, 141.24, 136.10, 130.72, 130.39, 130.11, 129.29, 128.38, 128.24, 128.09, 120.43, 117.02, 116.40, 101.43, 100.70, 62.23, 56.54, 14.36. MS (ESI) calcd C<sub>25</sub>H<sub>21</sub>NO<sub>4</sub> for [M+H]<sup>+</sup>, 400.15, found 400.26

**Ethyl 2-(3-ethoxyphenyl)-7-methoxy-4-oxo-1,4-dihydroquinoline-3-carboxylate 8g.** 34% yield from intermediate **7**, <sup>1</sup>H NMR (400 MHz, MeOD) δ 8.19 (d, *J* = 9.5 Hz, 1H), 7.49 – 7.39 (m, 1H), 7.18 – 7.03 (m, 3H), 4.10 (dq, *J* = 11.5, 7.0 Hz, 2H), 3.94 (s, 2H), 1.43 (t, *J* = 7.0 Hz, 2H), 1.02 (t, *J* = 7.2 Hz, 1H). <sup>13</sup>C NMR (101 MHz, MeOD) δ 176.57, 168.53, 165.16, 160.60, 152.18, 143.02, 136.53, 131.11, 128.22, 121.36, 120.26, 117.72, 116.44, 115.40, 100.23, 64.88, 62.25, 56.30, 15.10, 14.10. MS (ESI) calcd C<sub>21</sub>H<sub>21</sub>NO<sub>5</sub> for [M+H]<sup>+</sup>, 368.14, found 368.22.

**Ethyl 7-methoxy-4-oxo-2-(3-propoxyphenyl)-1,4-dihydroquinoline-3-carboxylate 8h.** 65% yield from intermediate **7**, <sup>1</sup>H NMR (400 MHz, MeOD) δ 8.19 (d, *J* = 9.8 Hz, 1H), 7.45 (s, 1H), 7.19 – 7.04 (m, 3H), 4.09 (q, *J* = 7.1 Hz, 1H), 4.02 (t, *J* = 6.5 Hz, 1H), 3.94 (s, 2H), 1.84 (m, 1H), 1.05 (dt, *J* = 20.5, 7.3 Hz, 3H). <sup>13</sup>C NMR (101 MHz, MeOD) δ 176.56, 168.53, 165.14, 160.77, 152.14, 143.00, 136.49, 131.10, 128.20, 121.32, 120.24, 117.69, 116.42, 115.41, 100.21, 70.87, 62.24, 56.28, 23.60, 14.09, 10.83. MS (ESI) calcd C<sub>22</sub>H<sub>23</sub>NO<sub>5</sub> for [M+H]<sup>+</sup>, 382.16, found 382.24

**Ethyl 2-(3-isopropoxyphenyl)-7-methoxy-4-oxo-1,4-dihydroquinoline-3-carboxylate 8i.** 44% yield from intermediate **7**, <sup>1</sup>H NMR (400 MHz, MeOD) δ 8.19 (dd, *J* = 8.2, 1.4 Hz, 1H), 7.50 – 7.39 (m, 1H), 7.19 – 7.02 (m, 3H), 4.69 (dt, *J* = 12.2, 6.1 Hz, 1H), 4.09 (q, *J* = 7.2 Hz, 1H), 3.95 (d, *J* = 5.5 Hz, 2H), 1.40 – 1.30 (m, 3H), 1.02 (t, *J* = 7.1 Hz, 1H). <sup>13</sup>C NMR (101 MHz, MeOD) δ 176.57, 168.50, 165.15, 159.54, 152.22, 143.00, 136.61, 131.14, 128.22, 121.26, 120.26, 118.87, 116.79, 116.64, 116.43, 100.23, 71.37, 62.22, 56.30, 22.31, 14.11. MS (ESI) calcd C<sub>22</sub>H<sub>23</sub>NO<sub>5</sub> for [M+H]<sup>+</sup>, 382.16, found 382.24

**Ethyl 2-(3-butoxyphenyl)-7-methoxy-4-oxo-1,4-dihydroquinoline-3-carboxylate 8j.** 36% yield from intermediate **7**, <sup>1</sup>H NMR (400 MHz, MeOD) δ 8.18 (d, *J* = 9.7 Hz, 1H), 7.44 (s, 1H), 7.18 – 7.03 (m, 2H), 4.07 (dt, *J* = 12.8, 6.8 Hz, 2H), 3.93 (d, *J* = 3.3 Hz, 2H), 1.86 – 1.72 (m, 1H), 1.60 – 1.47 (m, 1H), 1.01 (td, *J* = 7.3,

3.6 Hz, 3H). <sup>13</sup>C NMR (101 MHz, MeOD) δ 176.58, 168.55, 165.16, 160.78, 152.17, 143.03, 136.52, 131.12, 128.44, 128.22, 121.33, 120.26, 117.71, 116.44, 115.41, 114.58, 100.23, 69.04, 62.26, 56.30, 32.42, 20.31, 14.16, 14.11. MS (ESI) calcd C<sub>23</sub>H<sub>25</sub>NO<sub>5</sub> for [M+H]<sup>+</sup>, 396.17, found 396.25

**Ethyl 2-(3-isobutoxyphenyl)-7-methoxy-4-oxo-1,4-dihydroquinoline-3-carboxylate 8k.** 41% yield from intermediate 7, <sup>1</sup>H NMR (400 MHz, MeOD) δ 8.18 (d, *J* = 9.7 Hz, 1H), 7.44 (t, *J* = 8.3 Hz, 1H), 7.12 (dd, *J* = 6.0, 2.7 Hz, 1H), 7.06 (dd, *J* = 6.8, 2.4 Hz, 1H), 4.08 (q, *J* = 7.2 Hz, 1H), 3.93 (s, 2H), 3.81 (d, *J* = 6.5 Hz, 1H), 2.16 – 2.01 (m, 1H), 1.10 – 0.97 (m, 5H). <sup>13</sup>C NMR (101 MHz, MeOD) δ 176.58, 168.57, 165.17, 160.88, 152.15, 143.04, 136.52, 131.13, 128.22, 121.34, 120.27, 117.69, 116.44, 115.46, 100.24, 75.76, 62.26, 56.30, 29.53, 19.52, 14.13. MS (ESI) calcd C<sub>23</sub>H<sub>25</sub>NO<sub>5</sub> for [M+H]<sup>+</sup>, 396.17, found 396.25

**Ethyl 2-(3-(benzyloxy)phenyl)-7-methoxy-4-oxo-1,4-dihydroquinoline-3-carboxylate 8l.** 48% yield from intermediate 7, <sup>1</sup>H NMR (400 MHz, MeOD) δ 8.18 (d, *J* = 9.3 Hz, 1H), 7.45 (dd, *J* = 35.4, 6.6 Hz, 3H), 7.15 (dd, *J* = 56.3, 17.7 Hz, 3H), 5.19 (s, 1H), 4.06 (d, *J* = 7.2 Hz, 1H), 3.94 (s, 2H), 1.01 (t, *J* = 7.1 Hz, 1H). <sup>13</sup>C NMR (101 MHz, MeOD) δ 165.06, 160.36, 153.70, 150.16, 147.07, 138.38, 136.71, 131.32, 129.79, 129.27, 128.89, 128.32, 126.56, 121.95, 120.37, 118.07, 116.23, 100.58, 71.27, 62.22, 56.49, 14.36. MS (ESI) calcd C<sub>26</sub>H<sub>23</sub>NO<sub>5</sub> for [M+H]<sup>+</sup>, 430.16, found 430.22

**Ethyl 7-methoxy-4-oxo-2-(3-phenoxyphenyl)-1,4-dihydroquinoline-3-carboxylate 8m.** Yield 77% from intermediate 7. <sup>1</sup>H NMR (400 MHz, MeOD) δ 8.18 (d, *J* = 9.3 Hz, 1H), 7.53 (d, *J* = 7.7 Hz, 1H), 7.46 – 7.37 (m, 1H), 7.33 (d, *J* = 7.9 Hz, 1H), 7.20 (d, *J* = 7.5 Hz, 2H), 7.06 (d, *J* = 10.9 Hz, 2H), 4.09 (q, *J* = 7.2 Hz, 1H), 3.94 (s, 2H), 1.06 (t, *J* = 7.2 Hz, 1H). <sup>13</sup>C NMR (101 MHz, MeOD) δ 176.55, 168.36, 165.20, 159.22, 157.93, 151.51, 143.02, 136.99, 131.59, 131.18, 128.23, 125.22, 124.03, 121.46, 120.36, 120.29, 119.31, 116.67, 116.51, 100.24, 62.31, 56.31, 14.20. MS (ESI) calcd C<sub>25</sub>H<sub>21</sub>NO<sub>5</sub> for [M+H]<sup>+</sup>, 416.14, found 416.21

**Ethyl 7-methoxy-4-oxo-2-(3-(trifluoromethoxy)phenyl)-1,4-dihydroquinoline-3-carboxylate 8n.** 62% yield from intermediate 7, <sup>1</sup>H NMR (400 MHz, MeOD) δ 8.31 (d, *J* = 9.0 Hz, 1H), 8.20 (d, *J* = 9.0 Hz, 1H), 7.74 – 7.43 (m, 2H), 7.12 – 7.01 (m, 1H), 4.07 (q, *J* = 7.1 Hz, 1H), 3.95 (s, 2H), 1.01 (t, *J* = 7.2 Hz, 1H). <sup>13</sup>C NMR (101 MHz, MeOD) δ 176.50, 167.97, 165.28, 150.51, 143.02, 137.46, 131.91, 131.08, 128.35, 128.29, 123.98, 122.23, 120.40, 116.63, 100.31, 62.24, 56.33, 14.00. MS (ESI) calcd C<sub>20</sub>H<sub>16</sub>F<sub>3</sub>NO<sub>5</sub> for [M+H]<sup>+</sup>, 408.10, found 408.20

**Ethyl 2-(3-bromophenyl)-7-methoxy-4-oxo-1,4-dihydroquinoline-3-carboxylate 8r.** 24% yield from intermediate 7, <sup>1</sup>H NMR (400 MHz, MeOD) δ 8.21 (d, *J* = 9.8 Hz, 1H), 7.80 (d, *J* = 8.9 Hz, 2H), 7.60 (s, 1H), 7.54 (d, *J* = 7.8 Hz, 1H), 7.11 (d, *J* = 7.4 Hz, 2H), 4.12 (q, *J* = 7.2 Hz, 2H), 3.96 (s, 3H), 1.07 (t, *J* = 7.2 Hz, 3H). <sup>13</sup>C NMR (101 MHz, MeOD) δ 176.31, 168.06, 165.16, 150.97, 150.55, 143.55, 143.14, 137.49, 134.62, 132.37, 131.93, 128.47, 128.36, 123.57, 120.44, 116.58, 100.63, 62.34, 56.53, 14.38. MS (ESI) calcd C<sub>19</sub>H<sub>16</sub>BrNO<sub>4</sub> for [M+H]<sup>+</sup>, 402.03, found 402.13

**Ethyl 2-(3-acetylphenyl)-7-methoxy-4-oxo-1,4-dihydroquinoline-3-carboxylate 8s.** 35% yield from intermediate 7, <sup>1</sup>H NMR (400 MHz, MeOD) δ 8.21 (d, *J* = 8.9 Hz, 1H), 7.95 (s, 1H), 7.74 (s, 1H), 7.54 (t, *J* = 7.9 Hz, 1H), 7.33 (d, *J* = 7.7 Hz, 1H), 7.15 – 7.07 (m, 1H), 4.11 (q, *J* = 7.2 Hz, 1H), 3.97 (s, 2H), 2.65 (dt, *J* = 3.8, 1.9 Hz, 1H), 2.19 (s, 1H), 1.06 (t, *J* = 7.2 Hz, 2H). <sup>13</sup>C NMR (101 MHz, MeOD) δ 199.17, 176.55, 168.29, 165.25, 151.44, 143.12, 138.76, 135.90, 133.90, 131.32, 130.44, 129.22, 128.29, 120.37, 116.83, 116.58, 100.32, 62.31, 56.33, 26.83, 14.12. MS (ESI) calcd C<sub>21</sub>H<sub>19</sub>NO<sub>5</sub> for [M+H]<sup>+</sup>, 366.13, found 366.16

**Ethyl 7-methoxy-2-(3-(methylsulfonyl)phenyl)-4-oxo-1,4-dihydroquinoline-3-carboxylate 8t.** 28% yield from intermediate 7, <sup>1</sup>H NMR (400 MHz, MeOD) δ 8.21 (t, *J* = 12.0 Hz, 1H), 7.94 (s, 1H), 7.86 (d, *J* = 7.7 Hz, 1H), 7.15 – 7.04 (m, 1H), 4.16 – 4.04 (m, 1H), 3.96 (s, 1H), 3.21 (s, 1H), 1.04 (t, *J* = 7.1 Hz, 1H). <sup>13</sup>C NMR (101 MHz, MeOD) δ 176.34, 168.38, 165.05, 151.96, 143.19, 143.02, 141.24, 136.10, 130.71, 130.38, 130.10,

129.29, 128.38, 128.23, 128.09, 120.43, 117.02, 116.40, 100.69, 62.22, 56.54, 14.36. MS (ESI) calcd C<sub>20</sub>H<sub>19</sub>NO<sub>6</sub>S for [M+H]<sup>+</sup>, 402.09, found 402.20

**Ethyl 2-(3-(dimethylamino)phenyl)-7-methoxy-4-oxo-1,4-dihydroquinoline-3-carboxylate 8v.** 48% yield from intermediate **7**, <sup>1</sup>H NMR (400 MHz, MeOD) δ 8.19 (d, *J* = 9.5 Hz, 1H), 7.40 – 7.31 (m, 1H), 7.11 – 7.03 (m, 1H), 6.98 – 6.83 (m, 1H), 4.08 (q, *J* = 7.2 Hz, 1H), 3.94 (s, 2H), 3.01 (s, 3H), 1.02 (t, *J* = 7.2 Hz, 2H). <sup>13</sup>C NMR (101 MHz, MeOD) δ 176.25, 171.48, 168.10, 165.03, 151.82, 143.10, 140.87, 136.05, 130.60, 128.39, 124.69, 122.58, 120.52, 120.41, 116.87, 116.39, 100.68, 62.21, 56.58, 24.34, 14.42. MS (ESI) calcd C<sub>21</sub>H<sub>22</sub>N<sub>2</sub>O<sub>4</sub> for [M+H]<sup>+</sup>, 367.16, found 367.22

**Ethyl 2-(3-acetamidophenyl)-7-methoxy-4-oxo-1,4-dihydroquinoline-3-carboxylate 8w.** 55% yield from intermediate **7**, <sup>1</sup>H NMR (400 MHz, MeOD) δ 8.44 (d, *J* = 6.9 Hz, 1H), 8.21 (s, 1H), 8.12 (s, 1H), 7.36 (d, *J* = 6.9 Hz, 1H), 4.33 (d, *J* = 7.2 Hz, 1H), 4.20 (s, 1H), 3.49 (s, 1H), 1.28 (t, *J* = 7.2 Hz, 1H). <sup>13</sup>C NMR (101 MHz, MeOD) δ 176.25, 171.48, 168.10, 165.03, 164.19, 151.82, 143.11, 140.88, 136.06, 130.60, 128.39, 124.69, 122.59, 120.52, 120.42, 116.87, 116.39, 101.43, 100.68, 62.21, 56.58, 24.34, 14.42, 7.13. MS (ESI) calcd C<sub>21</sub>H<sub>20</sub>N<sub>2</sub>O<sub>5</sub> for [M+H]<sup>+</sup>, 381.14, found 381.24

**Ethyl 2-(3-hydroxyphenyl)-7-methoxy-4-oxo-1,4-dihydroquinoline-3-carboxylate 8x.** 36% yield from intermediate **7**, <sup>1</sup>H NMR (400 MHz, MeOD) δ 8.18 (d, *J* = 9.5 Hz, 1H), 7.35 (t, *J* = 8.2 Hz, 1H), 7.10 – 6.94 (m, 5H), 4.09 (q, *J* = 7.2 Hz, 2H), 3.93 (s, 3H), 3.36 (s, 1H), 1.02 (t, *J* = 7.2 Hz, 3H). <sup>13</sup>C NMR (101 MHz, MeOD) δ 176.58, 168.51, 165.14, 159.08, 152.42, 143.01, 136.56, 131.10, 128.22, 120.24, 120.18, 118.45, 116.52, 116.39, 116.12, 100.20, 62.24, 56.29, 14.07. MS (ESI) calcd C<sub>19</sub>H<sub>17</sub>NO<sub>5</sub> for [M+H]<sup>+</sup>, 340.11, found 340.13

**Ethyl 2-(3-(hydroxymethyl)phenyl)-7-methoxy-4-oxo-1,4-dihydroquinoline-3-carboxylate 8y.** 39% yield from intermediate **7**, <sup>1</sup>H NMR (400 MHz, MeOD) δ 8.20 (dd, *J* = 7.9, 1.6 Hz, 1H), 7.64 – 7.45 (m, 4H), 7.08 (dd, *J* = 8.3, 1.9 Hz, 2H), 4.72 (s, 2H), 4.08 (q, *J* = 7.2 Hz, 2H), 3.94 (s, 3H), 1.02 (t, *J* = 7.2 Hz, 3H). <sup>13</sup>C NMR (101 MHz, MeOD) δ 175.85, 167.79, 164.43, 151.67, 143.23, 142.34, 134.69, 129.17, 129.05, 127.50, 127.34, 126.78, 119.52, 115.98, 115.69, 99.49, 63.81, 61.52, 55.56, 13.38. MS (ESI) calcd C<sub>20</sub>H<sub>19</sub>NO<sub>5</sub> for [M+H]<sup>+</sup>, 354.13, found 354.15

**Ethyl 2-(3,5-dimethoxyphenyl)-7-methoxy-4-oxo-1,4-dihydroquinoline-3-carboxylate 8z.** 62% yield from intermediate **7**, <sup>1</sup>H NMR (400 MHz, MeOD) δ 8.17 (d, *J* = 9.7 Hz, 1H), 7.06 (dd, *J* = 4.8, 2.5 Hz, 2H), 6.73 (d, *J* = 2.3 Hz, 2H), 6.67 (d, *J* = 2.3 Hz, 1H), 4.10 (q, *J* = 7.2 Hz, 2H), 3.93 (s, 3H), 3.84 (s, 6H), 1.04 (t, *J* = 7.2 Hz, 3H). <sup>13</sup>C NMR (101 MHz, MeOD) δ 176.56, 168.60, 165.16, 162.63, 143.03, 137.00, 128.21, 120.29, 116.44, 107.45, 103.17, 100.26, 62.31, 56.30, 56.13, 14.13. MS (ESI) calcd C<sub>21</sub>H<sub>21</sub>NO<sub>6</sub> for [M+H]<sup>+</sup>, 384.14, found 384.18

**Ethyl 2-(3-fluoro-5-methoxyphenyl)-7-methoxy-4-oxo-1,4-dihydroquinoline-3-carboxylate 8aa.** 73% yield from intermediate **7**, <sup>1</sup>H NMR (400 MHz, MeOD) δ 8.18 (d, *J* = 9.3 Hz, 1H), 7.10 – 7.02 (m, 2H), 7.01 – 6.88 (m, 3H), 4.12 (q, *J* = 7.2 Hz, 2H), 3.93 (s, 3H), 3.87 (s, 3H), 1.06 (t, *J* = 7.2 Hz, 3H). <sup>13</sup>C NMR (101 MHz, MeOD) δ 176.52, 168.22, 166.08, 165.24, 163.63, 162.97, 162.85, 143.00, 137.67, 128.24, 120.34, 116.58, 111.55, 111.52, 108.66, 108.42, 104.50, 104.24, 100.28, 62.33, 56.56, 56.32, 14.13. MS (ESI) calcd C<sub>20</sub>H<sub>18</sub>FNO<sub>5</sub> for [M+H]<sup>+</sup>, 372.12, found 372.17

**Ethyl 2-(benzo[d][1,3]dioxol-5-yl)-7-isopropoxy-4-oxo-1,4-dihydroquinoline-3-carboxylate 9a.** 46% yield from intermediate **7**, <sup>1</sup>H NMR (400 MHz, MeOD) δ 8.17 (d, *J* = 8.8 Hz, 1H), 7.04 (ddd, *J* = 27.5, 14.6, 7.9 Hz, 5H), 6.08 (s, 2H), 4.76 (dt, *J* = 12.1, 6.0 Hz, 1H), 4.14 (q, *J* = 7.1 Hz, 2H), 1.41 (d, *J* = 6.0 Hz, 6H), 1.11 (t, *J* = 7.1 Hz, 3H). <sup>13</sup>C NMR (101 MHz, MeOD) δ 176.59, 168.72, 163.37, 151.78, 151.09, 149.52, 143.03, 128.87, 128.27, 123.84, 119.92, 117.21, 116.56, 109.57, 109.52, 103.34, 101.90, 71.79, 62.30, 22.13, 14.25. MS (ESI) calcd C<sub>22</sub>H<sub>21</sub>NO<sub>6</sub> for [M+H]<sup>+</sup>, 396.14, found 396.25

**Ethyl 2-([1,1'-biphenyl]-3-yl)-7-isopropoxy-4-oxo-1,4-dihydroquinoline-3-carboxylate 9b.** 63% yield from intermediate **7**,  $^1\text{H}$  NMR (400 MHz, MeOD)  $\delta$  8.21 (d,  $J$  = 8.6 Hz, 1H), 7.86 (dd,  $J$  = 4.7, 2.8 Hz, 2H), 7.74 – 7.30 (m, 8H), 7.06 (d,  $J$  = 8.7 Hz, 2H), 4.78 (dt,  $J$  = 12.1, 6.0 Hz, 1H), 4.08 (d,  $J$  = 7.1 Hz, 2H), 1.42 (d,  $J$  = 6.0 Hz, 7H), 0.96 (t,  $J$  = 7.1 Hz, 3H).  $^{13}\text{C}$  NMR (101 MHz, MeOD)  $\delta$  176.61, 168.61, 163.44, 152.30, 143.17, 143.09, 141.24, 135.99, 130.51, 130.15, 130.02, 129.07, 128.35, 128.18, 128.07, 127.93, 120.07, 117.33, 101.97, 101.42, 71.81, 62.27, 22.13, 14.08. MS (ESI) calcd C<sub>27</sub>H<sub>25</sub>NO<sub>4</sub> for  $[\text{M}+\text{H}]^+$ , 428.18, found 428.29

**Ethyl 7-isopropoxy-2-(3-methoxyphenyl)-4-oxo-1,4-dihydroquinoline-3-carboxylate 9c.** 59% yield from intermediate **7**,  $^1\text{H}$  NMR (400 MHz, MeOD)  $\delta$  8.19 (d,  $J$  = 8.8 Hz, 1H), 7.45 (d,  $J$  = 8.3 Hz, 1H), 7.15 (t,  $J$  = 5.2 Hz, 3H), 7.08 – 7.02 (m, 2H), 4.77 (dt,  $J$  = 12.1, 6.0 Hz, 1H), 4.09 (q,  $J$  = 7.1 Hz, 2H), 3.88 (s, 3H), 1.41 (d,  $J$  = 6.0 Hz, 6H), 1.02 (t,  $J$  = 7.1 Hz, 3H).  $^{13}\text{C}$  NMR (101 MHz, MeOD)  $\delta$  176.57, 168.59, 163.40, 161.33, 152.16, 143.07, 136.61, 131.12, 128.31, 121.48, 120.03, 117.30, 117.17, 116.52, 114.85, 101.96, 71.80, 62.25, 56.02, 22.13, 14.10. MS (ESI) calcd C<sub>22</sub>H<sub>23</sub>NO<sub>5</sub> for  $[\text{M}+\text{H}]^+$ , 382.16, found 382.24

**Ethyl 2-(benzo[d][1,3]dioxol-5-yl)-4-oxo-7-(trifluoromethoxy)-1,4-dihydroquinoline-3-carboxylate 10a.** 63% yield from intermediate **7**,  $^1\text{H}$  NMR (400 MHz, MeOD)  $\delta$  8.26 (d,  $J$  = 9.0 Hz, 1H), 7.46 (s, 1H), 7.25 (s, 1H), 7.05 – 6.97 (m, 2H), 6.89 (d,  $J$  = 7.9 Hz, 1H), 5.98 (s, 2H), 4.04 (q,  $J$  = 7.2 Hz, 2H), 1.00 (t,  $J$  = 7.2 Hz, 3H).  $^{13}\text{C}$  NMR (101 MHz, MeOD)  $\delta$  176.19, 168.30, 153.51, 153.04, 151.30, 149.61, 142.20, 129.44, 128.64, 124.52, 123.95, 118.45, 117.50, 110.70, 109.63, 109.50, 103.41, 62.42, 14.24. MS (ESI) calcd C<sub>20</sub>H<sub>14</sub>F<sub>3</sub>NO<sub>6</sub> for  $[\text{M}+\text{H}]^+$ , 422.08, found 422.15

**Ethyl 2-(3-methoxyphenyl)-4-oxo-7-(trifluoromethoxy)-1,4-dihydroquinoline-3-carboxylate 10b.** 72% yield from intermediate **7**,  $^1\text{H}$  NMR (400 MHz, MeOD)  $\delta$  8.40 (d,  $J$  = 9.0 Hz, 1H), 7.59 (s, 1H), 7.48 (t,  $J$  = 8.1 Hz, 1H), 7.37 (d,  $J$  = 8.9 Hz, 1H), 7.22 – 7.13 (m, 3H), 4.11 (q,  $J$  = 7.2 Hz, 2H), 3.88 (s, 3H), 1.03 (t,  $J$  = 7.2 Hz, 3H).  $^{13}\text{C}$  NMR (101 MHz, MeOD)  $\delta$  176.22, 168.08, 161.38, 153.56, 153.28, 142.07, 136.24, 131.21, 129.52, 124.60, 123.11, 121.45, 120.55, 118.57, 117.49, 117.44, 114.83, 110.66, 62.39, 56.05, 14.09. MS (ESI) calcd C<sub>20</sub>H<sub>16</sub>F<sub>3</sub>NO<sub>5</sub> for  $[\text{M}+\text{H}]^+$ , 408.10, found 408.20

**Ethyl 4-oxo-7-(trifluoromethoxy)-2-(3-(trifluoromethoxy)phenyl)-1,4-dihydroquinoline-3-carboxylate 10c.** 66% yield from intermediate **7**,  $^1\text{H}$  NMR (400 MHz, MeOD)  $\delta$  8.29 (d,  $J$  = 9.0 Hz, 1H), 7.64 – 7.40 (m, 5H), 7.27 (d,  $J$  = 9.0 Hz, 1H), 3.97 (q,  $J$  = 7.2 Hz, 2H), 0.90 (t,  $J$  = 7.1 Hz, 3H).  $^{13}\text{C}$  NMR (101 MHz, MeOD)  $\delta$  176.17, 167.55, 153.66, 151.81, 150.54, 142.09, 137.18, 131.99, 129.59, 128.33, 124.74, 124.21, 123.19, 123.10, 122.24, 120.64, 120.54, 118.76, 117.98, 117.52, 110.72, 62.38, 13.99. MS (ESI) calcd C<sub>20</sub>H<sub>13</sub>F<sub>6</sub>NO<sub>5</sub> for  $[\text{M}+\text{H}]^+$ , 462.07, found 462.19

**Ethyl 2-(benzo[d][1,3]dioxol-5-yl)-4-oxo-7-(trifluoromethyl)-1,4-dihydroquinoline-3-carboxylate 11a.** 47% yield from intermediate **7**,  $^1\text{H}$  NMR (400 MHz, MeOD)  $\delta$  8.46 (d,  $J$  = 8.5 Hz, 1H), 8.01 (s, 1H), 7.72 (s, 2H), 7.58 (s, 1H), 7.49 (s, 1H), 7.15 (d,  $J$  = 10.2 Hz, 1H), 7.01 (dd,  $J$  = 7.9, 5.3 Hz, 1H), 6.91 – 6.84 (m, 1H), 6.10 (s, 2H), 4.17 (q,  $J$  = 7.1 Hz, 2H), 1.09 (t,  $J$  = 5.8 Hz, 3H).  $^{13}\text{C}$  NMR (101 MHz, MeOD)  $\delta$  176.21, 168.14, 166.69, 161.12, 153.13, 151.39, 150.47, 150.15, 149.64, 149.46, 140.80, 139.77, 130.18, 128.25, 124.02, 110.47, 109.66, 109.55, 109.53, 103.45, 103.12, 62.73, 62.47, 14.23. MS (ESI) calcd C<sub>20</sub>H<sub>14</sub>F<sub>3</sub>NO<sub>5</sub> for  $[\text{M}+\text{H}]^+$ , 406.08, found 406.20

**Ethyl 2-(3-methoxyphenyl)-4-oxo-7-(trifluoromethyl)-1,4-dihydroquinoline-3-carboxylate 11b.** 62% yield from intermediate **7**,  $^1\text{H}$  NMR (400 MHz, MeOD)  $\delta$  8.48 (d,  $J$  = 8.4 Hz, 1H), 8.02 (s, 1H), 7.72 (d,  $J$  = 8.5 Hz, 1H), 7.49 (t,  $J$  = 8.2 Hz, 1H), 7.24 – 7.13 (m, 3H), 4.11 (q,  $J$  = 7.2 Hz, 2H), 3.88 (s, 3H), 1.04 (t,  $J$  = 7.2 Hz, 3H).  $^{13}\text{C}$  NMR (101 MHz, MeOD)  $\delta$  176.20, 167.99, 161.39, 153.49, 140.79, 136.19, 135.51, 135.18, 131.24, 128.30, 128.18, 126.37, 121.49, 121.45, 117.93, 117.57, 117.53, 117.48, 114.88, 101.43, 62.43, 56.05, 14.09. MS (ESI) calcd C<sub>20</sub>H<sub>16</sub>F<sub>3</sub>NO<sub>4</sub> for  $[\text{M}+\text{H}]^+$ , 392.10, found 392.19

**Ethyl 4-oxo-2-(3-(trifluoromethoxy)phenyl)-7-(trifluoromethyl)-1,4-dihydroquinoline-3-carboxylate 11c.** 53% yield from intermediate 7, <sup>1</sup>H NMR (400 MHz, MeOD) δ 8.49 (d, *J* = 8.5 Hz, 1H), 8.01 (s, 1H), 7.70 (d, *J* = 7.9 Hz, 2H), 7.59 (s, 1H), 7.44 – 7.40 (m, 1H), 7.37 (s, 1H), 4.10 (q, *J* = 7.1 Hz, 2H), 1.01 (td, *J* = 7.1, 4.4 Hz, 3H). <sup>13</sup>C NMR (101 MHz, MeOD) δ 167.48, 166.15, 160.84, 150.53, 148.92, 139.90, 137.24, 137.19, 134.09, 132.00, 131.82, 129.81, 129.07, 128.36, 124.25, 123.05, 122.84, 122.28, 121.63, 120.26, 114.26, 114.22, 62.41, 14.00. MS (ESI) calcd C<sub>20</sub>H<sub>13</sub>F<sub>6</sub>NO<sub>4</sub> for [M+H]<sup>+</sup>, 446.07, found 446.18

**Ethyl 2-(3-chlorophenyl)-4-oxo-7-(trifluoromethyl)-1,4-dihydroquinoline-3-carboxylate 11d.** 44% yield from intermediate 7, <sup>1</sup>H NMR (400 MHz, MeOD) δ 8.49 (d, *J* = 8.5 Hz, 1H), 8.01 (s, 1H), 7.76 – 7.54 (m, 5H), 4.13 (q, *J* = 7.2 Hz, 2H), 1.06 (t, *J* = 7.2 Hz, 3H). <sup>13</sup>C NMR (101 MHz, MeOD) δ 176.16, 167.57, 152.18, 140.83, 136.88, 136.58, 135.84, 135.61, 135.28, 131.82, 131.64, 129.45, 128.35, 128.30, 127.91, 126.35, 123.64, 121.64, 121.60, 117.92, 117.65, 62.46, 14.13, 13.92. MS (ESI) calcd C<sub>19</sub>H<sub>13</sub>ClF<sub>3</sub>NO<sub>3</sub> for [M+H]<sup>+</sup>, 396.05, found 396.13

**Ethyl 2-([1,1'-biphenyl]-3-yl)-7-hydroxy-4-oxo-1,4-dihydroquinoline-3-carboxylate 12a.** 37% yield from intermediate 7, <sup>1</sup>H NMR (400 MHz, MeOD) δ 8.55 (s, 1H), 8.14 (d, *J* = 8.6, 1H), 7.86 – 7.78 (m, 2H), 7.72 – 7.64 (m, 2H), 7.61 (t, *J* = 7.6, 1H), 7.54 (d, *J* = 7.6, 1H), 7.47 (t, *J* = 7.6, 2H), 7.38 (t, *J* = 7.4, 1H), 6.99 – 6.91 (m, 2H), 4.04 (q, *J* = 7.1, 2H), 0.93 (t, *J* = 7.1, 3H). <sup>13</sup>C NMR (101 MHz, MeOD) δ 176.69, 168.77, 164.16, 152.32, 143.33, 143.08, 141.27, 136.11, 130.43, 130.13, 129.91, 129.03, 128.41, 128.11, 128.07, 127.94, 119.36, 117.01, 116.19, 102.82, 62.21, 14.06. MS (ESI) calcd C<sub>24</sub>H<sub>19</sub>NO<sub>4</sub> for [M+H]<sup>+</sup>, 386.13, found 386.18

**Ethyl 7-hydroxy-4-oxo-2-(3-phenoxyphenyl)-1,4-dihydroquinoline-3-carboxylate 12b.** 42% yield from intermediate 7, <sup>1</sup>H NMR (400 MHz, MeOD) δ 8.11 (dd, *J* = 8.3, 1.0, 1H), 7.51 (td, *J* = 7.7, 0.9, 1H), 7.44 – 7.35 (m, 2H), 7.33 – 7.26 (m, 1H), 7.21 – 7.11 (m, 3H), 7.09 – 7.00 (m, 2H), 6.99 – 6.89 (m, 2H), 4.06 (q, *J* = 7.1, 2H), 1.03 (t, *J* = 7.1, 3H). <sup>13</sup>C NMR (101 MHz, MeOD) δ 176.64, 168.53, 163.73, 159.14, 157.98, 151.52, 143.21, 137.11, 131.50, 131.16, 128.43, 125.17, 124.06, 121.38, 120.32, 119.49, 119.37, 116.80, 116.13, 102.74, 62.26, 14.19. MS (ESI) calcd C<sub>24</sub>H<sub>19</sub>NO<sub>5</sub> for [M+H]<sup>+</sup>, 402.13, found 402.20

**Ethyl 2-([1,1'-biphenyl]-3-yl)-7-chloro-4-oxo-1,4-dihydroquinoline-3-carboxylate 13.** 56% yield from intermediate 7, <sup>1</sup>H NMR (400 MHz, MeOD) δ 8.29 (d, *J* = 8.7 Hz, 1H), 7.86 (s, 2H), 7.80 – 7.32 (m, 10H), 4.08 (q, *J* = 7.1 Hz, 2H), 0.97 (t, *J* = 7.1 Hz, 3H). <sup>13</sup>C NMR (101 MHz, MeOD) δ 176.43, 168.16, 153.11, 143.22, 141.82, 141.14, 140.24, 135.67, 130.57, 130.22, 130.16, 129.11, 128.57, 128.10, 128.06, 127.93, 126.48, 124.74, 119.14, 117.53, 62.39, 14.07. MS (ESI) calcd C<sub>24</sub>H<sub>18</sub>ClNO<sub>3</sub> for [M+H]<sup>+</sup>, 404.10, found 404.20

**Ethyl 2-(3-methoxyphenyl)-7-(methylthio)-4-oxo-1,4-dihydroquinoline-3-carboxylate 14.** 28% yield from 24, <sup>1</sup>H NMR (400 MHz, MeOD) δ 8.14 (d, *J* = 8.7 Hz, 1H), 7.49 – 7.37 (m, 2H), 7.31 (d, *J* = 8.7 Hz, 1H), 7.14 (s, 3H), 4.07 (q, *J* = 7.1 Hz, 2H), 3.86 (s, 3H), 2.58 (s, 3H), 1.00 (t, *J* = 7.1 Hz, 3H). <sup>13</sup>C NMR (101 MHz, MeOD) δ 176.67, 168.43, 161.34, 152.26, 148.18, 141.66, 136.47, 131.16, 126.55, 123.99, 121.48, 117.25, 116.91, 114.87, 113.70, 62.31, 56.04, 14.71, 14.09. MS (ESI) calcd C<sub>20</sub>H<sub>19</sub>NO<sub>4</sub>S for [M+H]<sup>+</sup>, 370.10, found 370.16

**Ethyl 2-(benzo[d][1,3]dioxol-5-yl)-5,7-difluoro-4-oxo-1,4-dihydroquinoline-3-carboxylate 15a.** 31% yield from intermediate 7, <sup>1</sup>H NMR (400 MHz, MeOD) δ 7.16 (dd, *J* = 9.3, 1.9, 1H), 7.09 (dt, *J* = 3.9, 1.6, 2H), 7.02 – 6.92 (m, 2H), 6.07 (s, 2H), 4.13 (q, *J* = 7.1, 2H), 1.11 (t, *J* = 7.1, 3H). MS (ESI) calcd C<sub>19</sub>H<sub>13</sub>F<sub>2</sub>NO<sub>5</sub> for [M+H]<sup>+</sup>, 374.08, found 374.17

**Ethyl 5,7-difluoro-2-(3-methoxyphenyl)-4-oxo-1,4-dihydroquinoline-3-carboxylate 15b.** 35% yield from intermediate 7, <sup>1</sup>H NMR (400 MHz, MeOD) δ 7.50 – 7.43 (m, 1H), 7.22 – 7.12 (m, 4H), 6.99 (ddd, *J* = 11.7, 9.3, 2.4, 1H), 4.10 (q, *J* = 7.1, 2H), 3.87 (s, 3H), 1.04 (t, *J* = 7.1, 3H). <sup>13</sup>C NMR (101 MHz, MeOD) δ 175.32,



167.91, 161.35, 152.13, 135.82, 131.20, 121.42, 118.89, 117.41, 114.83, 101.95, 101.70, 101.43, 101.18, 62.42, 56.04, 14.11. MS (ESI) calcd C<sub>19</sub>H<sub>15</sub>F<sub>2</sub>NO<sub>4</sub> for [M+H]<sup>+</sup>, 360.10, found 360.15

**Ethyl 5,7-difluoro-4-oxo-2-(3-phenoxyphenyl)-1,4-dihydroquinoline-3-carboxylate 15c.** 11% yield from intermediate **7**, <sup>1</sup>H NMR (400 MHz, MeOD) δ 7.53 (t, *J* = 8.4, 1H), 7.40 (t, *J* = 8.0, 2H), 7.31 (d, *J* = 7.9, 1H), 7.23 – 7.12 (m, 3H), 7.09 – 7.02 (m, 2H), 7.01 – 6.92 (m, 1H), 4.07 (q, *J* = 7.1, 2H), 1.06 (t, *J* = 7.1, 3H). <sup>13</sup>C NMR (101 MHz, MeOD) δ 175.27, 167.68, 167.17, 159.27, 157.86, 151.37, 136.13, 131.68, 131.20, 125.27, 123.95, 121.73, 120.38, 119.21, 102.06, 101.80, 101.79, 101.54, 101.30, 101.05, 62.50, 14.21. MS (ESI) calcd C<sub>24</sub>H<sub>17</sub>F<sub>2</sub>NO<sub>4</sub> for [M+H]<sup>+</sup>, 422.11, found 422.28.

**Ethyl 5,7-difluoro-4-oxo-2-(3-(trifluoromethoxy)phenyl)-1,4-dihydroquinoline-3-carboxylate 15d.** 10% yield from intermediate **7**, <sup>1</sup>H NMR (400 MHz, MeOD) δ 7.73 – 7.64 (m, 1H), 7.62 – 7.57 (m, 1H), 7.57 – 7.50 (m, 2H), 7.19 – 7.11 (m, 1H), 7.00 (ddd, *J* = 11.6, 9.3, 2.3, 1H), 4.06 (q, *J* = 7.1, 2H), 1.01 (t, *J* = 7.1, 3H). <sup>13</sup>C NMR (101 MHz, MeOD) δ 175.20, 167.32, 164.88, 164.29, 150.52, 136.62, 132.01, 128.31, 124.27, 122.21, 120.62, 119.01, 113.51, 102.19, 101.94, 101.93, 101.67, 101.39, 101.18, 101.14, 62.44, 14.02. MS (ESI) calcd C<sub>19</sub>H<sub>12</sub>F<sub>5</sub>NO<sub>4</sub> for [M+H]<sup>+</sup>, 414.07, found 414.21

**Ethyl 2-(benzo[d][1,3]dioxol-5-yl)-6,7-dimethoxy-4-oxo-1,4-dihydroquinoline-3-carboxylate 16a.** 56% yield from intermediate **7**, <sup>1</sup>H NMR (400 MHz, DMSO) δ 11.75 (s, 1H), 7.43 (s, 1H), 7.18 – 7.00 (m, 4H), 6.13 (s, 2H), 4.02 (q, *J* = 7.1, 2H), 3.86 (s, 3H), 3.85 (s, 3H), 1.02 (t, *J* = 7.1, 3H). <sup>13</sup>C NMR (101 MHz, DMSO) δ 172.43, 166.71, 153.25, 148.70, 147.34, 147.04, 147.00, 135.12, 127.45, 122.50, 118.45, 114.55, 108.44, 104.05, 101.73, 99.63, 60.10, 55.68, 55.55, 13.81. MS (ESI) calcd C<sub>21</sub>H<sub>19</sub>NO<sub>7</sub> for [M+H]<sup>+</sup>, 398.12, found 398.27

**Ethyl 2-([1,1'-biphenyl]-3-yl)-6,7-dimethoxy-4-oxo-1,4-dihydroquinoline-3-carboxylate 16b.** 62% yield from intermediate **7**, <sup>1</sup>H NMR (400 MHz, DMSO) δ 11.95 (s, 1H), 7.99 – 7.34 (m, 10H), 7.16 (d, *J* = 6.5, 1H), 3.98 (q, *J* = 7.0, 2H), 3.87 (d, *J* = 2.7, 6H), 0.89 (t, *J* = 7.0, 3H). <sup>13</sup>C NMR (101 MHz, DMSO) δ 172.44, 166.64, 153.33, 147.47, 147.15, 140.41, 139.19, 135.20, 134.47, 129.32, 129.11, 128.25, 127.97, 127.10, 126.74, 126.45, 118.61, 114.67, 104.09, 99.68, 60.12, 55.71, 55.57, 13.60. MS (ESI) calcd C<sub>26</sub>H<sub>23</sub>NO<sub>5</sub> for [M+H]<sup>+</sup>, 430.16, found 430.34

**Ethyl 6,7-dimethoxy-2-(3-methoxyphenyl)-4-oxo-1,4-dihydroquinoline-3-carboxylate 16c.** 62% yield from intermediate **7**, <sup>1</sup>H NMR (400 MHz, DMSO) δ 11.85 (s, 1H), 7.52 – 7.39 (m, 2H), 7.21 – 7.01 (m, 4H), 3.99 (q, *J* = 7.1, 2H), 3.87 (d, *J* = 3.2, 6H), 3.83 (s, 3H), 0.96 (t, *J* = 7.1, 3H). <sup>13</sup>C NMR (101 MHz, DMSO) δ 172.40, 166.56, 159.11, 153.29, 147.28, 147.12, 135.13, 129.87, 120.32, 118.56, 115.74, 114.57, 113.56, 104.05, 99.68, 60.10, 55.69, 55.56, 55.36, 13.67. MS (ESI) calcd C<sub>21</sub>H<sub>21</sub>NO<sub>6</sub> for [M+H]<sup>+</sup>, 384.14, found 384.28

**Ethyl 6,7-dimethoxy-4-oxo-2-(3-phenoxyphenyl)-1,4-dihydroquinoline-3-carboxylate 16d.** 55% yield from intermediate **7**, <sup>1</sup>H NMR (400 MHz, DMSO) δ 11.88 (s, 1H), 7.57 (t, *J* = 8.0, 1H), 7.44 (t, *J* = 8.0, 3H), 7.31 (d, *J* = 7.7, 1H), 7.25 – 7.17 (m, 2H), 7.17 – 7.11 (m, 2H), 7.11 – 7.00 (m, 2H), 3.96 (q, *J* = 7.1, 2H), 3.86 (s, 3H), 3.85 (s, 3H), 0.96 (t, *J* = 7.1, 3H). <sup>13</sup>C NMR (101 MHz, DMSO) δ 172.35, 166.41, 156.72, 156.00, 153.33, 147.18, 146.74, 135.59, 135.11, 130.51, 130.22, 124.03, 123.15, 119.99, 118.91, 118.61, 117.91, 114.53, 104.04, 99.69, 60.14, 55.70, 55.56, 13.68. MS (ESI) calcd C<sub>26</sub>H<sub>23</sub>NO<sub>6</sub> for [M+H]<sup>+</sup>, 446.15, found 446.28

**Ethyl 2-(benzo[d][1,3]dioxol-5-yl)-7-chloro-6-methoxy-4-oxo-1,4-dihydroquinoline-3-carboxylate 17a.** 22% yield from intermediate **7**, <sup>1</sup>H NMR (400 MHz, DMSO) δ 7.77 (s, 1H), 7.62 (s, 1H), 7.14 (d, *J* = 1.7, 1H), 7.06 (dt, *J* = 8.1, 4.9, 2H), 6.13 (s, 2H), 4.03 (q, *J* = 7.1, 2H), 3.95 (s, 3H), 1.02 (t, *J* = 7.1, 3H). <sup>13</sup>C NMR (101 MHz, DMSO) δ 172.40, 166.54, 157.70, 151.27, 148.79, 147.38, 146.73, 127.17, 124.51, 122.57, 120.49,

114.67, 110.99, 108.48, 105.40, 101.75, 60.22, 56.37, 13.81. MS (ESI) calcd C<sub>20</sub>H<sub>16</sub>ClNO<sub>6</sub> for [M+H]<sup>+</sup>, 402.07, found 402.24

**Ethyl 2-([1,1'-biphenyl]-3-yl)-7-chloro-6-methoxy-4-oxo-1,4-dihydroquinoline-3-carboxylate 17b.** 55% yield from intermediate 7, <sup>1</sup>H NMR (400 MHz, DMSO) δ 12.13 (s, 1H), 7.94 – 7.82 (m, 2H), 7.79 (s, 1H), 7.77 – 7.71 (m, 2H), 7.69 – 7.62 (m, 2H), 7.59 – 7.47 (m, 3H), 7.44 (dd, *J* = 4.9, 3.7, 1H), 4.02 – 3.94 (m, 5H), 0.88 (t, *J* = 7.1, 3H). <sup>13</sup>C NMR (101 MHz, DMSO) δ 172.49, 166.21, 151.48, 148.66, 140.48, 139.08, 134.21, 133.87, 129.41, 129.12, 128.47, 128.02, 127.44, 127.12, 126.73, 126.47, 124.56, 120.13, 114.90, 105.48, 60.26, 56.41, 13.56. MS (ESI) calcd C<sub>25</sub>H<sub>20</sub>ClNO<sub>4</sub> for [M+H]<sup>+</sup>, 434.11, found 434.31

**Ethyl 7-chloro-6-methoxy-2-(3-methoxyphenyl)-4-oxo-1,4-dihydroquinoline-3-carboxylate 17c.** 28% yield from intermediate 7, <sup>1</sup>H NMR (400 MHz, DMSO) δ 12.05 (s, 1H), 7.78 (s, 1H), 7.63 (s, 1H), 7.48 (t, *J* = 8.1, 1H), 7.21 – 7.06 (m, 3H), 4.00 (q, *J* = 7.1, 2H), 3.96 (s, 3H), 3.82 (s, 3H), 0.95 (t, *J* = 7.1, 3H). <sup>13</sup>C NMR (101 MHz, DMSO) δ 172.42, 166.22, 159.15, 151.40, 148.59, 134.98, 134.02, 129.97, 127.34, 124.54, 120.32, 115.89, 114.75, 113.63, 105.42, 60.23, 56.38, 55.38, 13.64. MS (ESI) calcd C<sub>20</sub>H<sub>18</sub>ClNO<sub>5</sub> for [M+H]<sup>+</sup>, 388.09, found 388.25

**Ethyl 7-chloro-6-methoxy-4-oxo-2-(3-phenoxyphenyl)-1,4-dihydroquinoline-3-carboxylate 17d.** 21% yield from intermediate 7, <sup>1</sup>H NMR (400 MHz, DMSO) δ 12.08 (s, 1H), 7.77 (s, 1H), 7.59 (dd, *J* = 15.3, 7.2, 2H), 7.45 (dd, *J* = 11.3, 4.6, 2H), 7.33 (d, *J* = 7.6, 1H), 7.26 – 7.14 (m, 3H), 7.06 (d, *J* = 8.5, 2H), 3.97 (m, 5H), 0.96 (t, *J* = 7.1, 3H). <sup>13</sup>C NMR (101 MHz, DMSO) δ 172.43, 166.00, 156.81, 155.90, 151.50, 147.92, 135.30, 133.80, 130.62, 130.24, 127.46, 124.56, 124.10, 123.14, 120.13, 118.97, 117.89, 114.74, 105.43, 60.29, 56.40, 13.66. MS (ESI) calcd C<sub>25</sub>H<sub>20</sub>ClNO<sub>5</sub> for [M+H]<sup>+</sup>, 450.10, found 450.25

**Ethyl 2-(benzo[d][1,3]dioxol-5-yl)-6,7-dichloro-4-oxo-1,4-dihydroquinoline-3-carboxylate 18a.** 11% yield from intermediate 7, <sup>1</sup>H NMR (400 MHz, DMSO) δ 12.14 (s, 1H), 8.19 (s, 1H), 7.89 (s, 1H), 7.11 (ddd, *J* = 10.4, 9.8, 1.6, 3H), 6.15 (s, 2H), 4.05 (q, *J* = 7.1, 2H), 1.02 (t, *J* = 7.1, 3H). <sup>13</sup>C NMR (101 MHz, DMSO) δ 172.03, 165.81, 149.56, 149.15, 147.48, 138.65, 134.99, 126.78, 126.38, 124.23, 122.72, 120.59, 115.92, 108.59, 108.42, 101.88, 60.47, 13.77. MS (ESI) calcd C<sub>19</sub>H<sub>13</sub>Cl<sub>2</sub>NO<sub>5</sub> for [M+H]<sup>+</sup>, 406.02, found 406.21

**Ethyl 2-([1,1'-biphenyl]-3-yl)-6,7-dichloro-4-oxo-1,4-dihydroquinoline-3-carboxylate 18b.** 10% yield from intermediate 7, <sup>1</sup>H NMR (400 MHz, DMSO) δ 12.33 (s, 1H), 8.22 (s, 1H), 7.88 (d, *J* = 11.2, 3H), 7.80 – 7.33 (m, 7H), 3.97 (q, *J* = 7.1, 2H), 0.88 (t, *J* = 7.1, 3H). <sup>13</sup>C NMR (101 MHz, DMSO) δ 172.33, 140.82, 140.46, 140.34, 139.56, 135.38, 129.75, 129.53, 128.79, 128.41, 127.51, 127.13, 126.86, 126.78, 125.09, 116.23, 60.72, 13.98. MS (ESI) calcd C<sub>24</sub>H<sub>17</sub>Cl<sub>2</sub>NO<sub>3</sub> for [M+H]<sup>+</sup>, 438.06, found 438.22

**Ethyl 6,7-dichloro-2-(3-methoxyphenyl)-4-oxo-1,4-dihydroquinoline-3-carboxylate 18c.** 19% yield from intermediate 7, <sup>1</sup>H NMR (400 MHz, DMSO) δ 12.23 (s, 1H), 8.20 (s, 1H), 7.89 (s, 1H), 7.58 – 7.32 (m, 2H), 7.21 – 7.06 (m, 3H), 4.00 (q, *J* = 7.1, 2H), 3.82 (s, 3H), 0.95 (t, *J* = 7.1, 3H). <sup>13</sup>C NMR (101 MHz, DMSO) δ 171.96, 165.85, 159.58, 159.16, 134.85, 130.00, 126.70, 126.37, 124.45, 121.03, 120.30, 119.53, 118.50, 116.44, 116.06, 115.86, 113.62, 112.77, 60.38, 55.40, 13.62. MS (ESI) calcd C<sub>19</sub>H<sub>15</sub>Cl<sub>2</sub>NO<sub>4</sub> for [M+H]<sup>+</sup>, 392.04, found 393.22

**Ethyl 6,7-dichloro-4-oxo-2-(3-phenoxyphenyl)-1,4-dihydroquinoline-3-carboxylate 18d.** 22% yield from intermediate 7, <sup>1</sup>H NMR (400 MHz, DMSO) δ 12.27 (s, 1H), 8.20 (s, 1H), 7.88 (s, 1H), 7.59 (t, *J* = 7.9, 1H), 7.45 (dd, *J* = 11.2, 4.6, 2H), 7.34 (d, *J* = 7.6, 1H), 7.28 – 7.15 (m, 3H), 7.06 (d, *J* = 8.4, 2H), 3.98 (q, *J* = 7.0, 2H), 0.96 (t, *J* = 7.1, 3H). <sup>13</sup>C NMR (101 MHz, DMSO) δ 171.97, 170.78, 165.57, 159.71, 156.83, 155.88, 130.65, 130.25, 126.37, 124.45, 124.12, 123.11, 120.30, 118.98, 118.13, 117.86, 115.85, 112.36, 60.44, 13.65. MS (ESI) calcd C<sub>24</sub>H<sub>17</sub>Cl<sub>2</sub>NO<sub>4</sub> for [M+H]<sup>+</sup>, 454.05, found 454.22

**Ethyl 2-(benzo[d][1,3]dioxol-5-yl)-6-chloro-7-methoxy-4-oxo-1,4-dihydroquinoline-3-carboxylate 19a.** 23% yield from intermediate **7**, <sup>1</sup>H NMR (400 MHz, DMSO) δ 11.95 (s, 1H), 8.02 (d, *J* = 2.3, 1H), 7.26 (s, 1H), 7.09 (ddd, *J* = 9.8, 9.2, 1.7, 3H), 6.14 (s, 2H), 4.03 (q, *J* = 7.1, 2H), 3.95 (s, 3H), 1.02 (t, *J* = 7.1, 3H). <sup>13</sup>C NMR (101 MHz, DMSO) δ 174.12, 172.12, 166.23, 157.27, 148.93, 148.69, 147.40, 139.97, 127.12, 125.67, 122.58, 119.15, 118.85, 115.32, 108.49, 108.39, 101.81, 100.57, 60.29, 56.47, 13.79. MS (ESI) calcd C<sub>20</sub>H<sub>16</sub>ClNO<sub>6</sub> for [M+H]<sup>+</sup>, 402.07, found 402.24

**Ethyl 2-([1,1'-biphenyl]-3-yl)-6-chloro-7-methoxy-4-oxo-1,4-dihydroquinoline-3-carboxylate 19b.** 36% yield from intermediate **7**, <sup>1</sup>H NMR (400 MHz, DMSO) δ 12.13 (s, 1H), 8.06 (s, 1H), 7.93 – 7.81 (m, 2H), 7.74 (d, *J* = 7.9, 2H), 7.66 (t, *J* = 7.7, 1H), 7.59 – 7.37 (m, 4H), 7.28 (s, 1H), 4.06 – 3.88 (m, 5H), 0.89 (t, *J* = 7.1, 3H). <sup>13</sup>C NMR (101 MHz, DMSO) δ 172.14, 166.13, 157.35, 149.16, 140.45, 140.00, 139.10, 134.14, 129.38, 129.12, 128.51, 128.02, 127.07, 126.73, 126.44, 125.74, 119.33, 118.98, 115.47, 100.60, 60.30, 56.49, 13.58. MS (ESI) calcd C<sub>25</sub>H<sub>20</sub>ClNO<sub>4</sub> for [M+H]<sup>+</sup>, 434.11, found 434.25

**Ethyl 6-chloro-7-methoxy-2-(3-methoxyphenyl)-4-oxo-1,4-dihydroquinoline-3-carboxylate 19c.** 29% yield from intermediate **7**, <sup>1</sup>H NMR (400 MHz, DMSO) δ 8.04 (s, 1H), 7.47 (t, *J* = 8.1, 1H), 7.28 (s, 1H), 7.13 (dt, *J* = 8.1, 4.3, 3H), 4.04 – 3.95 (m, 2H), 3.95 (s, 3H), 3.82 (s, 3H), 0.95 (t, *J* = 7.1, 3H). <sup>13</sup>C NMR (101 MHz, DMSO) δ 172.12, 166.16, 159.14, 157.28, 149.15, 140.15, 134.95, 129.94, 125.69, 120.29, 119.25, 119.00, 115.97, 115.33, 113.55, 100.77, 60.28, 56.48, 55.39, 13.65. MS (ESI) calcd C<sub>20</sub>H<sub>18</sub>ClNO<sub>5</sub> for [M+H]<sup>+</sup>, 388.09, found 388.25

**Ethyl 6-chloro-7-methoxy-4-oxo-2-(3-phenoxyphenyl)-1,4-dihydroquinoline-3-carboxylate 19d.** 68% yield from intermediate **7**, <sup>1</sup>H NMR (400 MHz, DMSO) δ 12.08 (s, 1H), 8.02 (s, 1H), 7.56 (t, *J* = 8.0, 1H), 7.44 (dd, *J* = 11.3, 4.6, 2H), 7.32 (d, *J* = 7.7, 1H), 7.28 – 7.14 (m, 4H), 7.05 (d, *J* = 8.5, 2H), 4.08 – 3.87 (m, 5H), 0.95 (t, *J* = 7.1, 3H). <sup>13</sup>C NMR (101 MHz, DMSO) δ 171.98, 157.13, 156.69, 156.03, 130.45, 130.21, 125.63, 124.00, 123.13, 120.03, 118.89, 117.90, 60.21, 56.43, 13.67. MS (ESI) calcd C<sub>25</sub>H<sub>20</sub>ClNO<sub>5</sub> for [M+H]<sup>+</sup>, 450.10, found 450.25

**Ethyl 6-chloro-2-(3-chlorophenyl)-7-methoxy-4-oxo-1,4-dihydroquinoline-3-carboxylate 19e.** 45% yield from intermediate **7**, <sup>1</sup>H NMR (400 MHz, DMSO) δ 12.12 (s, 1H), 8.05 (s, 1H), 7.67 (d, *J* = 2.0 Hz, 2H), 7.63 – 7.55 (m, 1H), 7.55 – 7.48 (m, 1H), 7.24 (s, 1H), 4.01 (q, *J* = 7.0 Hz, 2H), 3.96 (s, 3H), 0.96 (t, *J* = 7.1 Hz, 3H). <sup>13</sup>C NMR (101 MHz, DMSO) δ 172.02, 165.72, 157.39, 147.78, 139.85, 135.34, 133.23, 130.60, 130.21, 127.96, 126.94, 125.72, 119.47, 118.99, 115.41, 100.51, 60.34, 56.49, 13.62. MS (ESI) calcd C<sub>19</sub>H<sub>15</sub>Cl<sub>2</sub>NO<sub>4</sub> for [M+H]<sup>+</sup>, 392.04, found 392.14

**Ethyl 2-(3-bromophenyl)-6-chloro-7-methoxy-4-oxo-1,4-dihydroquinoline-3-carboxylate 19f.** 66% yield from intermediate **7**, <sup>1</sup>H NMR (400 MHz, DMSO) δ 12.12 (s, 1H), 8.05 (s, 1H), 7.87 – 7.73 (m, 2H), 7.63 – 7.47 (m, 2H), 7.24 (s, 1H), 4.01 (q, *J* = 7.1 Hz, 2H), 3.96 (s, 3H), 0.96 (t, *J* = 7.0 Hz, 3H). <sup>13</sup>C NMR (101 MHz, DMSO) δ 172.02, 165.73, 157.39, 147.70, 139.85, 135.55, 133.11, 130.80, 130.73, 127.29, 125.72, 121.66, 119.46, 118.99, 115.41, 100.52, 60.35, 56.49, 13.65. MS (ESI) calcd C<sub>19</sub>H<sub>15</sub>BrClNO<sub>4</sub> for [M+H]<sup>+</sup>, 438.00, found 438.06

**Ethyl 6-chloro-2-(3-fluoro-5-methoxyphenyl)-7-methoxy-4-oxo-1,4-dihydroquinoline-3-carboxylate 19g.** 24% yield from intermediate **7**, <sup>1</sup>H NMR (400 MHz, DMSO) δ 12.10 (s, 1H), 8.04 (s, 1H), 7.25 (s, 1H), 7.09 (dd, *J* = 11.0, 2.2, 1H), 7.04 – 6.96 (m, 2H), 4.03 (q, *J* = 7.1, 2H), 3.95 (s, 3H), 3.84 (s, 3H), 0.99 (t, *J* = 7.1, 3H). <sup>13</sup>C NMR (101 MHz, DMSO) δ 172.05, 165.83, 163.83, 161.41, 160.77, 160.65, 157.39, 147.80, 139.90, 125.72, 119.45, 119.01, 115.34, 110.60, 107.44, 107.21, 103.45, 103.20, 100.61, 60.38, 56.51, 56.04, 13.64. MS (ESI) calcd C<sub>20</sub>H<sub>17</sub>ClFNO<sub>5</sub> for [M+H]<sup>+</sup>, 406.08, found 406.20

**Ethyl 2-(benzo[d][1,3]dioxol-5-yl)-6-fluoro-7-methoxy-4-oxo-1,4-dihydroquinoline-3-carboxylate 20a.** 31% yield from intermediate 7, <sup>1</sup>H NMR (400 MHz, DMSO) δ 11.99 (s, 1H), 7.72 (d, *J* = 11.6, 1H), 7.30 (d, *J* = 7.4, 1H), 7.08 (ddd, *J* = 9.8, 9.1, 1.7, 3H), 6.14 (s, 2H), 4.02 (q, *J* = 7.1, 2H), 3.93 (s, 3H), 1.02 (t, *J* = 7.1, 3H). <sup>13</sup>C NMR (101 MHz, DMSO) δ 172.39, 166.48, 151.38, 151.24, 150.58, 148.79, 148.58, 148.14, 147.35, 137.71, 122.52, 118.17, 114.64, 109.85, 109.67, 108.42, 101.75, 60.20, 56.20, 13.80. MS (ESI) calcd C<sub>20</sub>H<sub>16</sub>FNO<sub>6</sub> for [M+H]<sup>+</sup>, 386.10, found 386.24

**Ethyl 2-([1,1'-biphenyl]-3-yl)-6-fluoro-7-methoxy-4-oxo-1,4-dihydroquinoline-3-carboxylate 20b.** 35% yield from intermediate 7, <sup>1</sup>H NMR (400 MHz, DMSO) δ 12.10 (s, 1H), 7.89 (d, *J* = 7.7, 1H), 7.85 (s, 1H), 7.76 (t, *J* = 10.2, 3H), 7.66 (t, *J* = 7.7, 1H), 7.53 (dd, *J* = 14.8, 7.4, 3H), 7.42 (t, *J* = 6.8, 1H), 7.31 (d, *J* = 7.2, 1H), 4.03 – 3.96 (m, 2H), 3.95 (s, 3H), 0.89 (t, *J* = 7.1, 3H). <sup>13</sup>C NMR (101 MHz, DMSO) δ 172.43, 166.24, 151.42, 150.71, 148.77, 148.26, 140.45, 139.11, 137.40, 134.19, 129.37, 129.12, 128.45, 128.01, 127.08, 126.73, 126.45, 114.87, 109.99, 109.79, 101.64, 60.26, 56.24, 13.58. MS (ESI) calcd C<sub>25</sub>H<sub>20</sub>FNO<sub>4</sub> for [M+H]<sup>+</sup>, 418.14, found 418.28

**Ethyl 6-fluoro-7-methoxy-2-(3-methoxyphenyl)-4-oxo-1,4-dihydroquinoline-3-carboxylate 20c.** 56% yield from intermediate 7, <sup>1</sup>H NMR (400 MHz, DMSO) δ 12.09 (s, 1H), 7.74 (d, *J* = 11.6, 1H), 7.47 (dd, *J* = 11.6, 4.7, 1H), 7.31 (d, *J* = 7.3, 1H), 7.19 – 7.04 (m, 3H), 3.99 (q, *J* = 7.1, 2H), 3.93 (d, *J* = 6.4, 3H), 3.82 (s, 3H), 0.95 (t, *J* = 7.1, 3H). <sup>13</sup>C NMR (101 MHz, DMSO) δ 172.39, 166.28, 159.12, 151.45, 151.32, 150.66, 148.80, 148.21, 137.62, 135.08, 129.90, 120.29, 118.26, 115.86, 114.69, 113.57, 109.90, 109.71, 101.86, 60.21, 56.21, 55.36, 13.65. MS (ESI) calcd C<sub>20</sub>H<sub>18</sub>FNO<sub>5</sub> for [M+H]<sup>+</sup>, 372.12, found 372.23

**Ethyl 6-fluoro-7-methoxy-4-oxo-2-(3-phenoxyphenyl)-1,4-dihydroquinoline-3-carboxylate 20d.** 61% yield from intermediate 7, <sup>1</sup>H NMR (400 MHz, DMSO) δ 12.06 (s, 1H), 7.74 (d, *J* = 11.5, 1H), 7.58 (t, *J* = 7.9, 1H), 7.45 (dd, *J* = 11.1, 4.3, 2H), 7.31 (t, *J* = 8.0, 2H), 7.24 – 7.13 (m, 3H), 7.06 (d, *J* = 7.9, 2H), 4.05 – 3.83 (m, 5H), 0.96 (t, *J* = 7.0, 3H). <sup>13</sup>C NMR (101 MHz, DMSO) δ 172.34, 166.05, 156.74, 155.96, 151.53, 151.39, 148.27, 148.15, 137.42, 135.37, 130.55, 130.22, 124.05, 123.12, 120.13, 118.92, 118.31, 118.26, 117.90, 114.69, 109.92, 109.73, 101.74, 60.27, 56.23, 13.66. MS (ESI) calcd C<sub>25</sub>H<sub>20</sub>FNO<sub>5</sub> for [M+H]<sup>+</sup>, 434.13, found 434.23

**Ethyl 6-fluoro-7-methoxy-4-oxo-2-(3-(trifluoromethoxy)phenyl)-1,4-dihydroquinoline-3-carboxylate 20e.** 48% yield from intermediate 7, <sup>1</sup>H NMR (400 MHz, DMSO) δ 12.14 (s, 1H), 7.81 – 7.66 (m, 2H), 7.65 – 7.57 (m, 2H), 7.55 (s, 1H), 7.26 (d, *J* = 7.3, 1H), 4.01 – 3.88 (m, 6H), 0.90 (t, *J* = 7.1, 3H). <sup>13</sup>C NMR (101 MHz, DMSO) δ 172.31, 165.73, 151.51, 148.11, 147.41, 137.30, 135.64, 130.89, 127.48, 122.78, 120.89, 118.41, 118.36, 114.82, 110.02, 109.83, 101.61, 99.50, 60.23, 56.27, 13.44. MS (ESI) calcd C<sub>20</sub>H<sub>15</sub>F<sub>4</sub>NO<sub>5</sub> for [M+H]<sup>+</sup>, 426.09, found 426.22

**Ethyl 6-fluoro-2-(3-fluorophenyl)-7-methoxy-4-oxo-1,4-dihydroquinoline-3-carboxylate 20f.** 36% yield from intermediate 7, <sup>1</sup>H NMR (400 MHz, DMSO) δ 12.09 (s, 1H), 7.76 (d, *J* = 11.5, 1H), 7.62 (dt, *J* = 7.8, 6.8, 1H), 7.52 – 7.41 (m, 2H), 7.39 (d, *J* = 7.7, 1H), 7.27 (d, *J* = 7.3, 1H), 3.99 (q, *J* = 7.1, 2H), 3.94 (s, 3H), 0.94 (t, *J* = 7.1, 3H). <sup>13</sup>C NMR (101 MHz, DMSO) δ 172.34, 165.87, 162.94, 160.50, 151.62, 151.49, 150.77, 148.32, 147.55, 137.33, 135.67, 130.97, 130.89, 124.47, 118.34, 117.27, 117.06, 115.42, 115.19, 114.78, 110.00, 109.80, 101.63, 60.29, 56.26, 13.61. MS (ESI) calcd C<sub>19</sub>H<sub>15</sub>F<sub>2</sub>NO<sub>4</sub> for [M+H]<sup>+</sup>, 360.10, found 360.15

**Ethyl 2-(3-chlorophenyl)-6-fluoro-7-methoxy-4-oxo-1,4-dihydroquinoline-3-carboxylate 20g.** 29% yield from intermediate 7, <sup>1</sup>H NMR (400 MHz, DMSO) δ 12.10 (s, 1H), 7.75 (d, *J* = 11.5, 1H), 7.69 – 7.63 (m, 2H), 7.63 – 7.55 (m, 1H), 7.51 (dt, *J* = 7.6, 1.3, 1H), 7.27 (d, *J* = 7.4, 1H), 4.00 (q, *J* = 7.1, 2H), 3.94 (s, 3H), 0.95 (t, *J* = 7.1, 3H). <sup>13</sup>C NMR (101 MHz, DMSO) δ 165.86, 151.62, 151.49, 148.33, 147.46, 137.34, 135.47, 133.23, 130.61, 130.16, 127.99, 126.97, 118.30, 114.79, 109.99, 109.80, 101.63, 60.31, 56.25, 13.64. MS (ESI) calcd C<sub>19</sub>H<sub>15</sub>ClFNO<sub>4</sub> for [M+H]<sup>+</sup>, 376.07, found 376.17

**Ethyl 2-(3-bromophenyl)-6-fluoro-7-methoxy-4-oxo-1,4-dihydroquinoline-3-carboxylate 20h.** 35% yield from intermediate **7**,  $^1\text{H}$  NMR (400 MHz, DMSO)  $\delta$  12.09 (s, 1H), 7.88 – 7.70 (m, 3H), 7.63 – 7.45 (m, 2H), 7.27 (d,  $J = 7.3$  Hz, 1H), 4.01 (q,  $J = 7.0$  Hz, 2H), 3.95 (s, 3H), 0.96 (t,  $J = 7.0$  Hz, 3H).  $^{13}\text{C}$  NMR (101 MHz, DMSO)  $\delta$  172.28, 165.85, 151.59, 151.46, 150.75, 148.30, 147.36, 137.32, 135.66, 133.04, 130.79, 130.73, 127.30, 121.64, 118.34, 118.28, 114.77, 109.97, 109.78, 101.62, 60.30, 56.24, 13.66. MS (ESI) calcd  $\text{C}_{19}\text{H}_{15}\text{BrFNO}_4$  for  $[\text{M}+\text{H}]^+$ , 420.02, found 422.11

**Ethyl 6-fluoro-2-(3-fluoro-5-methoxyphenyl)-7-methoxy-4-oxo-1,4-dihydroquinoline-3-carboxylate 20i.** 20% yield from intermediate **7**,  $^1\text{H}$  NMR (400 MHz, DMSO)  $\delta$  7.74 (d,  $J = 11.6$ , 1H), 7.30 (d,  $J = 7.4$ , 1H), 7.05 (dt,  $J = 11.0$ , 2.1, 1H), 6.97 (t,  $J = 4.8$ , 2H), 4.01 (q,  $J = 7.1$ , 2H), 3.93 (s, 3H), 3.83 (s, 3H), 0.98 (t,  $J = 7.1$ , 3H).  $^{13}\text{C}$  NMR (101 MHz, DMSO)  $\delta$  172.28, 166.32, 163.79, 161.37, 160.68, 160.56, 151.39, 150.69, 148.25, 138.14, 118.47, 114.42, 110.54, 109.82, 109.63, 107.41, 107.18, 103.11, 102.86, 102.35, 60.22, 56.21, 55.97, 13.64. MS (ESI) calcd  $\text{C}_{20}\text{H}_{17}\text{F}_2\text{NO}_5$  for  $[\text{M}+\text{H}]^+$ , 390.11, found 390.18

**Ethyl 2-(2',6'-dimethyl-[1,1'-biphenyl]-3-yl)-6-fluoro-7-methoxy-4-oxo-1,4-dihydroquinoline-3-carboxylate 20j.** 28% yield from intermediate **7**,  $^1\text{H}$  NMR (400 MHz, MeOD)  $\delta$  7.87 (d,  $J = 11.4$ , 1H), 7.62 (dt,  $J = 7.8$ , 7.1, 2H), 7.39 – 7.31 (m, 2H), 7.21 (d,  $J = 7.2$ , 1H), 7.19 – 7.08 (m, 3H), 4.08 (q,  $J = 7.1$ , 2H), 4.00 (s, 3H), 2.05 (s, 6H), 1.04 (t,  $J = 7.1$ , 3H).  $^{13}\text{C}$  NMR (101 MHz, MeOD)  $\delta$  175.80, 168.41, 154.52, 154.39, 153.40, 151.99, 150.92, 150.64, 143.39, 141.87, 139.14, 136.80, 135.64, 132.57, 130.30, 130.09, 128.69, 128.54, 127.84, 119.85, 116.57, 111.33, 111.14, 102.11, 62.34, 57.03, 21.07, 14.26. MS (ESI) calcd  $\text{C}_{27}\text{H}_{24}\text{FNO}_4$  for  $[\text{M}+\text{H}]^+$ , 446.17, found 446.24

**Ethyl 2-(2'-chloro-[1,1'-biphenyl]-3-yl)-6-fluoro-7-methoxy-4-oxo-1,4-dihydroquinoline-3-carboxylate 20k.** 21% yield from intermediate **7**,  $^1\text{H}$  NMR (400 MHz, DMSO)  $\delta$  7.75 (d,  $J = 11.6$ , 1H), 7.61 (dd,  $J = 19.4$ , 14.3, 4H), 7.47 (dd,  $J = 4.3$ , 2.0, 3H), 7.28 (d,  $J = 7.1$ , 1H), 4.05 – 3.85 (m, 5H), 0.87 (t,  $J = 7.1$ , 3H).  $^{13}\text{C}$  NMR (101 MHz, DMSO)  $\delta$  172.40, 158.47, 155.57, 153.28, 149.18, 138.88, 138.78, 131.41, 131.17, 129.99, 129.67, 128.75, 128.56, 127.72, 127.51, 121.99, 114.66, 113.68, 112.29, 110.36, 109.89, 109.70, 105.59, 60.19, 56.20, 13.54. MS (ESI) calcd  $\text{C}_{25}\text{H}_{19}\text{ClFNO}_4$  for  $[\text{M}+\text{H}]^+$ , 452.10, found 452.18

**Ethyl 2-(3-(2,6-dimethylphenoxy)phenyl)-6-fluoro-7-methoxy-4-oxo-1,4-dihydroquinoline-3-carboxylate 20l.** 28% yield from intermediate **7**,  $^1\text{H}$  NMR (400 MHz, DMSO)  $\delta$  8.36 (s, 0H), 7.72 (d,  $J = 11.7$ , 1H), 7.47 (t,  $J = 7.9$ , 1H), 7.28 (d,  $J = 7.4$ , 1H), 7.18 (d,  $J = 5.0$ , 3H), 7.15 – 7.07 (m, 1H), 6.94 – 6.81 (m, 2H), 3.90 (dd,  $J = 13.3$ , 5.8, 5H), 2.09 (s, 6H), 0.93 (t,  $J = 7.1$ , 3H).  $^{13}\text{C}$  NMR (101 MHz, DMSO)  $\delta$  172.20, 157.03, 150.08, 148.12, 130.58, 130.23, 129.22, 125.51, 121.48, 118.57, 115.61, 113.89, 109.72, 109.53, 59.97, 56.14, 15.86, 13.66. MS (ESI) calcd  $\text{C}_{27}\text{H}_{24}\text{FNO}_5$  for  $[\text{M}+\text{H}]^+$ , 462.16, found 462.26

**Ethyl 2-(3-(4,5-dimethylthiazol-2-yl)phenyl)-6-fluoro-7-methoxy-4-oxo-1,4-dihydroquinoline-3-carboxylate 20m.** 22% yield from intermediate **7**,  $^1\text{H}$  NMR (400 MHz, DMSO)  $\delta$  8.02 (s, 1H), 7.76 (d,  $J = 11.5$  Hz, 1H), 7.68 – 7.56 (m, 1H), 7.31 (d,  $J = 7.1$  Hz, 1H), 3.98 (m,  $J = 16.0$ , 8.9 Hz, 3H), 2.41 (s, 2H), 2.33 (s, 2H), 0.94 (t,  $J = 7.1$  Hz, 2H).  $^1\text{H}$  NMR (400 MHz, DMSO)  $\delta$  8.02 (s, 1H), 7.76 (d,  $J = 11.5$  Hz, 1H), 7.68 – 7.56 (m, 2H), 7.31 (d,  $J = 7.1$  Hz, 1H), 3.98 (dd,  $J = 16.0$ , 8.9 Hz, 5H), 2.41 (s, 3H), 2.33 (s, 3H), 0.94 (t,  $J = 7.1$  Hz, 3H).  $^{13}\text{C}$  NMR (101 MHz, DMSO)  $\delta$  172.38, 166.25, 160.82, 151.37, 150.73, 149.43, 148.86, 148.28, 133.52, 129.64, 129.15, 127.66, 127.17, 124.95, 118.40, 114.77, 109.93, 109.75, 101.95, 60.30, 56.23, 14.59, 13.63, 11.09. MS (ESI) calcd  $\text{C}_{24}\text{H}_{21}\text{FN}_2\text{O}_4\text{S}$  for  $[\text{M}+\text{H}]^+$ , 453.12, found 453.06

**Ethyl 2-(3-((4,5-dimethylthiazol-2-yl)methyl)phenyl)-6-fluoro-7-methoxy-4-oxo-1,4-dihydroquinoline-3-carboxylate 20n.** 24% yield from intermediate **7**,  $^1\text{H}$  NMR (400 MHz, MeOD)  $\delta$  7.87 (d,  $J = 11.4$  Hz, 1H), 7.51 (d,  $J = 11.0$  Hz, 4H), 7.18 (d,  $J = 6.4$  Hz, 1H), 4.30 (s, 2H), 4.00 (s, 3H), 3.95 (q,  $J = 7.2$  Hz, 2H), 2.30 (d,  $J = 11.0$  Hz, 6H), 0.90 (t,  $J = 7.1$  Hz, 3H).  $^{13}\text{C}$  NMR (101 MHz, MeOD)  $\delta$  175.77, 168.08, 166.90, 154.55, 154.41,

153.41, 152.05, 150.93, 148.61, 140.46, 139.03, 135.84, 132.08, 130.40, 129.67, 128.35, 128.02, 119.92, 119.86, 116.20, 111.40, 111.20, 102.05, 62.21, 57.05, 39.44, 14.30, 14.08, 11.07. MS (ESI) calcd C<sub>25</sub>H<sub>23</sub>FN<sub>2</sub>O<sub>4</sub>S for [M+H]<sup>+</sup>, 467.14, found 467.33

**2-Morpholinoethyl 7-methoxy-4-oxo-2-(3-phenoxyphenyl)-1,4-dihydroquinoline-3-carboxylate 27a.** 50% yield from acid intermediate **26**, <sup>1</sup>H NMR (400 MHz, MeOD) δ 8.17 (d, *J* = 9.0, 1H), 7.57 – 7.50 (m, 1H), 7.46 – 7.36 (m, 2H), 7.37 – 7.29 (m, 1H), 7.25 – 7.14 (m, 3H), 7.05 (dd, *J* = 14.3, 4.6, 4H), 4.29 (t, *J* = 5.5, 2H), 3.92 (s, 3H), 3.77 – 3.69 (m, 4H), 2.73 (t, *J* = 5.3, 2H), 2.63 (s, 3H). <sup>13</sup>C NMR (101 MHz, MeOD) δ 176.56, 167.94, 165.34, 159.23, 157.87, 151.84, 143.04, 136.75, 131.75, 131.23, 131.19, 128.23, 125.29, 124.09, 121.63, 120.38, 119.45, 116.78, 115.89, 100.31, 66.94, 62.15, 57.28, 56.36, 54.30. MS (ESI) calcd C<sub>29</sub>H<sub>28</sub>N<sub>2</sub>O<sub>6</sub> for [M+H]<sup>+</sup>, 501.19, found 501.35

**3-Morpholinopropyl 7-methoxy-4-oxo-2-(3-phenoxyphenyl)-1,4-dihydroquinoline-3-carboxylate 27b.** 87% yield from acid intermediate **26**, <sup>1</sup>H NMR (400 MHz, MeOD) δ 8.18 (d, *J* = 8.8, 1H), 7.54 (t, *J* = 7.9, 1H), 7.47 – 7.37 (m, 2H), 7.32 (d, *J* = 7.7, 1H), 7.23 – 7.14 (m, 3H), 7.10 – 7.01 (m, 4H), 4.12 (t, *J* = 6.0, 2H), 3.92 (d, *J* = 2.8, 3H), 3.80 – 3.70 (m, 4H), 2.66 (br, 4H), 2.53 (t, *J* = 7.0, 2H), 1.79 (dd, *J* = 12.8, 6.3, 2H). <sup>13</sup>C NMR (101 MHz, MeOD) δ 176.56, 165.31, 159.19, 157.90, 152.19, 143.03, 137.03, 131.75, 131.22, 128.24, 125.26, 124.05, 121.61, 120.39, 119.40, 116.75, 115.86, 100.37, 66.82, 64.90, 56.86, 56.36, 54.38, 40.46, 25.38. MS (ESI) calcd C<sub>30</sub>H<sub>30</sub>N<sub>2</sub>O<sub>6</sub> for [M+H]<sup>+</sup>, 515.21, found 515.37

**2-(Dimethylamino)ethyl 7-methoxy-4-oxo-2-(3-phenoxyphenyl)-1,4-dihydroquinoline-3-carboxylate 27c.** 32% yield from acid intermediate **26**, <sup>1</sup>H NMR (400 MHz, MeOD) δ 8.20 (d, *J* = 9.0, 1H), 7.59 – 7.50 (m, 1H), 7.46 – 7.33 (m, 4H), 7.20 (td, *J* = 9.4, 3.8, 4H), 7.11 – 7.02 (m, 5H), 4.48 – 4.40 (m, 2H), 3.94 (s, 3H), 2.86 (s, 3H), 2.80 (s, 5H). <sup>13</sup>C NMR (101 MHz, MeOD) δ 176.81, 167.59, 165.51, 159.23, 157.93, 143.11, 136.42, 131.80, 131.22, 131.19, 128.21, 125.27, 124.10, 121.84, 120.38, 119.43, 119.17, 117.05, 116.56, 100.42, 60.45, 57.24, 56.40, 56.31, 43.93. MS (ESI) calcd C<sub>27</sub>H<sub>26</sub>N<sub>2</sub>O<sub>5</sub> for [M+H]<sup>+</sup>, 459.18, found 459.31

**3-(Dimethylamino)propyl 7-methoxy-4-oxo-2-(3-phenoxyphenyl)-1,4-dihydroquinoline-3-carboxylate 27d.** 62% yield from acid intermediate **26**, <sup>1</sup>H NMR (400 MHz, MeOD) δ 8.21 (d, *J* = 9.0, 1H), 7.54 (t, *J* = 7.9, 1H), 7.41 (t, *J* = 8.0, 2H), 7.32 (d, *J* = 7.6, 1H), 7.25 – 7.12 (m, 3H), 7.11 – 6.97 (m, 4H), 4.24 (t, *J* = 5.4, 2H), 3.92 (s, 3H), 3.25 (t, *J* = 6.3, 2H), 2.90 (s, 6H), 2.18 – 2.02 (m, 2H). <sup>13</sup>C NMR (101 MHz, MeOD) δ 176.86, 167.61, 165.43, 159.05, 158.05, 153.94, 142.81, 137.00, 131.69, 131.19, 128.36, 125.18, 124.11, 121.73, 120.41, 120.33, 119.53, 116.97, 114.28, 100.34, 65.05, 57.71, 56.39, 43.96, 24.47. MS (ESI) calcd C<sub>28</sub>H<sub>28</sub>N<sub>2</sub>O<sub>5</sub> for [M+H]<sup>+</sup>, 473.20, found 473.33

**6-(Dimethylamino)hexyl 7-methoxy-4-oxo-2-(3-phenoxyphenyl)-1,4-dihydroquinoline-3-carboxylate 27e.** 68% yield from acid intermediate **26**, <sup>1</sup>H NMR (400 MHz, MeOD) δ 8.19 – 8.13 (m, 1H), 7.53 (t, *J* = 7.8, 1H), 7.44 – 7.37 (m, 2H), 7.35 – 7.29 (m, 1H), 7.23 – 7.14 (m, 3H), 7.09 – 7.01 (m, 4H), 4.03 (t, *J* = 6.3, 2H), 3.92 (s, 3H), 3.06 (dd, *J* = 9.4, 6.9, 2H), 2.84 (s, 6H), 1.74 – 1.60 (m, 2H), 1.56 – 1.42 (m, 2H), 1.40 – 1.20 (m, 4H). <sup>13</sup>C NMR (101 MHz, MeOD) δ 176.55, 165.24, 159.14, 157.92, 151.37, 143.07, 136.99, 131.70, 131.23, 128.15, 125.25, 124.09, 121.59, 120.32, 119.37, 116.64, 100.30, 66.14, 58.89, 56.35, 43.40, 29.16, 26.96, 26.41, 25.47. MS (ESI) calcd C<sub>31</sub>H<sub>34</sub>N<sub>2</sub>O<sub>5</sub> for [M+H]<sup>+</sup>, 515.25, found 515.37

**2-Morpholinoethyl 6-fluoro-7-methoxy-4-oxo-2-(3-phenoxyphenyl)-1,4-dihydroquinoline-3-carboxylate 28a.** 51% yield from acid intermediate **26**, <sup>1</sup>H NMR (400 MHz, MeOD) δ 7.85 (d, *J* = 11.3, 1H), 7.59 – 7.49 (m, 1H), 7.41 (dd, *J* = 8.4, 7.6, 2H), 7.32 (d, *J* = 7.6, 1H), 7.23 – 7.13 (m, 4H), 7.06 (dd, *J* = 8.6, 0.9, 2H), 4.14 (t, *J* = 5.9, 2H), 4.00 (s, 3H), 3.81 (t, *J* = 4.7, 4H), 2.80 (s, 4H), 2.70 (t, *J* = 6.9, 2H), 1.88 (dd, *J* = 12.8, 6.4, 2H). <sup>13</sup>C NMR (101 MHz, MeOD) δ 175.81, 167.86, 159.19, 157.89, 154.70, 154.56, 153.56, 152.40, 151.08, 138.99, 136.90, 131.78, 131.23, 125.27, 124.05, 121.68, 120.39, 119.99, 119.93, 119.40, 115.18, 111.36, 111.16,

102.24, 101.42, 66.38, 64.94, 57.12, 57.00, 54.19, 40.45, 24.92. MS (ESI) calcd C<sub>29</sub>H<sub>27</sub>FN<sub>2</sub>O<sub>6</sub> for [M+H]<sup>+</sup>, 519.19, found 519.24

**3-Morpholinopropyl 6-fluoro-7-methoxy-4-oxo-2-(3-phenoxyphenyl)-1,4-dihydroquinoline-3-carboxylate 28b.** 37% yield from acid intermediate **26**, <sup>1</sup>H NMR (400 MHz, MeOD) δ 7.87 (d, *J* = 11.1, 1H), 7.55 (t, *J* = 7.8, 1H), 7.41 (t, *J* = 7.4, 2H), 7.34 (d, *J* = 7.5, 1H), 7.26 – 7.14 (m, 4H), 7.06 (d, *J* = 7.7, 2H), 4.29 (d, *J* = 4.6, 2H), 4.00 (s, 3H), 3.73 (s, 4H), 2.72 (s, 2H), 2.62 (s, 4H). <sup>13</sup>C NMR (101 MHz, MeOD) δ 175.83, 167.79, 159.27, 157.85, 154.72, 154.59, 153.53, 151.68, 151.05, 139.06, 136.66, 131.79, 131.24, 125.31, 124.08, 121.68, 120.40, 119.81, 119.42, 115.55, 111.37, 111.17, 102.15, 66.97, 62.26, 57.29, 57.10, 54.33, 40.45. MS (ESI) calcd C<sub>30</sub>H<sub>29</sub>FN<sub>2</sub>O<sub>6</sub> for [M+H]<sup>+</sup>, 533.20, found 533.26

**2-(Pyrrolidin-1-yl)ethyl 6-fluoro-7-methoxy-4-oxo-2-(3-phenoxyphenyl)-1,4-dihydroquinoline-3-carboxylate 28c.** 48% yield from acid intermediate **26**, <sup>1</sup>H NMR (400 MHz, DMSO) δ 8.16 (s, 1H), 7.76 (d, *J* = 11.6 Hz, 1H), 7.55 (t, *J* = 7.8 Hz, 1H), 7.44 (dd, *J* = 11.3, 4.6 Hz, 2H), 7.31 (dd, *J* = 16.3, 7.5 Hz, 2H), 7.19 (dd, *J* = 13.5, 4.0 Hz, 3H), 7.06 (d, *J* = 8.4 Hz, 2H), 4.18 (t, *J* = 5.4 Hz, 2H), 3.94 (s, 3H), 2.81 (s, 2H), 2.70 (s, 4H), 1.76 (s, 4H). <sup>13</sup>C NMR (101 MHz, DMSO) δ 172.24, 166.63, 163.30, 156.63, 156.05, 151.37, 151.24, 150.80, 148.35, 130.44, 130.20, 123.96, 123.19, 119.88, 118.83, 118.32, 118.26, 118.01, 113.50, 109.66, 109.47, 103.18, 61.78, 56.20, 53.30, 52.64, 22.88. MS (ESI) calcd C<sub>29</sub>H<sub>27</sub>FN<sub>2</sub>O<sub>5</sub> for [M+H]<sup>+</sup>, 503.19, found 503.37

**N-(3-Morpholinopropyl) 6-fluoro-7-methoxy-4-oxo-2-(3-phenoxyphenyl)-1,4-dihydroquinoline-3-carboxamide 28d.** 56% yield from acid intermediate **26**, <sup>1</sup>H NMR (400 MHz, DMSO) δ 12.54 – 11.29 (m, 1H), 8.67 (s, 1H), 8.15 (d, *J* = 3.6 Hz, 1H), 7.78 (d, *J* = 11.6 Hz, 1H), 7.52 (t, *J* = 7.9 Hz, 1H), 7.48 – 7.37 (m, 2H), 7.35 – 7.24 (m, 2H), 7.16 (ddd, *J* = 10.7, 6.4, 2.0 Hz, 3H), 7.06 (d, *J* = 8.4 Hz, 2H), 3.93 (s, 3H), 3.54 (d, *J* = 4.0 Hz, 4H), 3.08 (d, *J* = 5.7 Hz, 2H), 2.30 (s, 4H), 2.20 (t, *J* = 6.9 Hz, 2H), 1.54 – 1.37 (m, 2H). <sup>13</sup>C NMR (101 MHz, DMSO) δ 173.82, 164.78, 163.19, 156.28, 155.98, 151.44, 151.31, 150.68, 149.25, 148.23, 136.98, 136.74, 130.09, 129.91, 123.67, 123.37, 119.53, 118.73, 118.54, 115.92, 110.02, 109.84, 101.44, 66.09, 56.20, 55.67, 53.20, 36.83, 25.69. MS (ESI) calcd C<sub>30</sub>H<sub>30</sub>FN<sub>3</sub>O<sub>5</sub> for [M+H]<sup>+</sup>, 532.22, found 532.41

**N-(2-(Pyrrolidin-1-yl)ethyl) 6-fluoro-7-methoxy-4-oxo-2-(3-phenoxyphenyl)-1,4-dihydroquinoline-3-carboxamide 28e.** 51% yield from acid intermediate **26**, <sup>1</sup>H NMR (400 MHz, DMSO) δ 8.87 (s, 1H), 7.79 (d, *J* = 11.5 Hz, 1H), 7.50 (t, *J* = 7.9 Hz, 1H), 7.42 (dd, *J* = 11.2, 4.5 Hz, 2H), 7.32 (d, *J* = 6.3 Hz, 2H), 7.25 – 7.10 (m, 3H), 7.06 (d, *J* = 8.0 Hz, 2H), 3.93 (s, 3H), 3.26 (d, *J* = 5.3 Hz, 2H), 2.62 (d, *J* = 12.5 Hz, 5H), 1.74 (s, 4H). <sup>13</sup>C NMR (101 MHz, DMSO) δ 173.66, 165.48, 156.40, 155.89, 151.32, 151.19, 150.75, 148.30, 137.67, 130.07, 129.81, 123.57, 123.42, 119.39, 118.76, 118.44, 114.95, 109.67, 102.36, 56.19, 54.07, 53.34, 40.14, 39.93, 39.72, 39.51, 39.30, 39.09, 38.88, 37.23, 22.97. MS (ESI) calcd C<sub>29</sub>H<sub>28</sub>FN<sub>3</sub>O<sub>4</sub> for [M+H]<sup>+</sup>, 502.21, found 502.36

**N-(3-(Pyrrolidin-1-yl)propyl) 6-fluoro-7-methoxy-4-oxo-2-(3-phenoxyphenyl)-1,4-dihydroquinoline-3-carboxamide 28f.** 49% yield from acid intermediate **26**, <sup>1</sup>H NMR (400 MHz, DMSO) δ 8.79 (s, 1H), 8.24 (s, 1H), 7.78 (d, *J* = 11.6 Hz, 1H), 7.51 (t, *J* = 7.9 Hz, 1H), 7.42 (t, *J* = 7.9 Hz, 2H), 7.31 (d, *J* = 7.5 Hz, 2H), 7.16 (dd, *J* = 20.0, 11.2 Hz, 3H), 7.06 (d, *J* = 8.3 Hz, 2H), 3.93 (s, 3H), 3.12 (d, *J* = 5.7 Hz, 2H), 2.70 (s, 4H), 2.61 (t, *J* = 7.1 Hz, 2H), 1.76 (s, 4H), 1.65 – 1.49 (m, 2H). <sup>13</sup>C NMR (101 MHz, DMSO) δ 173.76, 165.21, 156.27, 155.95, 151.37, 151.24, 150.67, 149.67, 148.23, 137.40, 137.06, 130.07, 129.86, 123.64, 123.36, 119.43, 118.67, 118.52, 115.57, 109.91, 109.72, 101.80, 56.18, 53.28, 52.64, 36.49, 27.04, 22.87. MS (ESI) calcd C<sub>30</sub>H<sub>30</sub>FN<sub>3</sub>O<sub>4</sub> for [M+H]<sup>+</sup>, 516.22, found 516.41

**2-Methoxyethyl 6-fluoro-7-methoxy-4-oxo-2-(3-phenoxyphenyl)-1,4-dihydroquinoline-3-carboxylate 28g.** 48% yield from acid intermediate **26**, <sup>1</sup>H NMR (400 MHz, DMSO) δ 12.10 (s, 1H), 7.73 (dd, *J* = 11.4, 5.3, 1H), 7.56 (t, *J* = 7.6, 1H), 7.45 (dd, *J* = 11.1, 4.5, 2H), 7.31 (dd, *J* = 15.2, 6.9, 2H), 7.23 – 7.13 (m, 3H), 7.07 (d, *J* = 7.6, 2H), 4.10 – 3.99 (m, 2H), 3.94 (s, 3H), 3.15 (s, 3H). <sup>13</sup>C NMR (101 MHz, DMSO) δ 172.28, 166.32,

156.70, 156.07, 151.44, 151.32, 150.70, 148.26, 135.68, 130.52, 130.21, 125.87, 125.23, 123.98, 123.14, 120.11, 118.85, 118.38, 118.32, 118.00, 114.33, 109.88, 109.69, 102.03, 69.39, 63.47, 57.96, 56.21. MS (ESI) calcd C<sub>26</sub>H<sub>22</sub>FNO<sub>6</sub> for [M+H]<sup>+</sup>, 464.14, found 464.19

**2-Hydroxyethyl 6-fluoro-7-methoxy-4-oxo-2-(3-phenoxyphenyl)-1,4-dihydroquinoline-3-carboxylate**  
**28h.** 34% yield from acid intermediate **26**, <sup>1</sup>H NMR (400 MHz, MeOD) δ 8.57 (s, 1H), 7.89 (d, *J* = 11.4 Hz, 1H), 7.55 (t, *J* = 8.0 Hz, 1H), 7.42 (t, *J* = 7.0 Hz, 2H), 7.36 (d, *J* = 7.5 Hz, 1H), 7.26 – 7.16 (m, 4H), 7.08 (d, *J* = 8.3 Hz, 2H), 4.18 – 4.12 (m, 2H), 4.02 (s, 3H), 3.61 (t, *J* = 4.9 Hz, 2H). <sup>13</sup>C NMR (101 MHz, MeOD) δ 175.82, 168.28, 159.24, 157.94, 154.58, 154.45, 153.44, 151.69, 150.96, 139.06, 136.76, 131.64, 131.18, 125.18, 124.08, 121.61, 120.40, 119.91, 119.85, 119.34, 115.97, 111.34, 111.15, 102.14, 67.78, 60.77, 57.07. MS (ESI) calcd C<sub>25</sub>H<sub>20</sub>FNO<sub>6</sub> for [M+H]<sup>+</sup>, 450.13, found 450.25



**Table S1. SAR of 7-Methoxy 4(1H)-quinolone derivatives 8a-aa**

| CMPD      | SJNumber    | Average                           | Average                         | Average                            | Average                                     | Average                                        |
|-----------|-------------|-----------------------------------|---------------------------------|------------------------------------|---------------------------------------------|------------------------------------------------|
|           |             | EC <sub>50</sub> K1<br>( $\mu$ M) | EC <sub>50</sub> C2B ( $\mu$ M) | EC <sub>50</sub><br>D10 ( $\mu$ M) | EC <sub>50</sub><br>D10_yDHOD<br>( $\mu$ M) | EC <sub>50</sub><br>D10_yDHOD+PG<br>( $\mu$ M) |
| <b>8a</b> | SJ000311131 | 0.30 +/- 0.02                     | 0.91 +/- 0.62                   | 0.06 +/- 0.25                      | >15                                         | 0.07 +/- 0.01                                  |
| <b>8b</b> | SJ000311166 | 0.82 +/- 0.07                     | >15                             | 0.60 +/- 0.79                      | >15                                         | >15                                            |
| <b>8c</b> | SJ000311169 | 0.30 +/- 0.01                     | 0.06 +/- 0.05                   | 0.01 +/- 0.01                      | >15                                         | <0.001                                         |
| <b>8d</b> | SJ000311513 | 0.22 +/- 0.03                     | 0.18 +/- 0.04                   | 0.01 +/- 0.01                      | >15                                         | <0.001                                         |
| <b>8e</b> | SJ000311507 | 0.07 +/- 0.02                     | <0.001                          | <0.001                             | >15                                         | <0.001                                         |
| <b>8f</b> | SJ000311171 | 0.13 +/- 0.01                     | 0.21 +/- 0.04                   | 0.04 +/- 0.05                      | >15                                         | <0.001                                         |
| <b>8g</b> | SJ000311854 | 0.07 +/- 0.01                     | 0.001 +/- 0.01                  | <0.001                             | >15                                         | <0.001                                         |
| <b>8h</b> | SJ000311850 | 0.02 +/- 0.01                     | <0.001                          | <0.001                             | >15                                         | <0.001                                         |
| <b>8i</b> | SJ000311502 | 0.16 +/- 0.03                     | <0.001                          | <0.001                             | >15                                         | <0.001                                         |
| <b>8j</b> | SJ000311851 | 0.03 +/- 0.01                     | <0.001                          | <0.001                             | >15                                         | <0.001                                         |
| <b>8k</b> | SJ000311505 | 0.04 +/- 0.01                     | <0.001                          | <0.001                             | >15                                         | <0.001                                         |

|            |             |               |               |               |     |               |
|------------|-------------|---------------|---------------|---------------|-----|---------------|
| <b>8l</b>  | SJ000311501 | 0.08 +/- 0.01 | <0.001        | <0.001        | >15 | <0.001        |
| <b>8m</b>  | SJ000311901 | 0.03 +/- 0.01 | <0.001        | <0.001        | >15 | <0.001        |
| <b>8n</b>  | SJ000311853 | 0.11 +/- 0.01 | <0.001        | <0.001        | >15 | <0.001        |
| <b>8o</b>  | SJ000311167 | 0.22 +/- 0.02 | >15           | 0.01 +/- 0.01 | >15 | <0.001        |
| <b>8p</b>  | SJ000311173 | 0.55 +/- 0.02 | 7.7 +/- 10    | 0.27 +/- 0.36 | >15 | 2.1 +/- 2.5   |
| <b>8q</b>  | SJ000311162 | 0.18 +/- 0.02 | >15           | <0.001        | >15 | <0.001        |
| <b>8s</b>  | SJ000311510 | 0.13 +/- 0.05 | 1.8 +/- 1.5   | <0.001        | >15 | 0.41 +/- 0.24 |
| <b>8r</b>  | SJ000311511 | 1.45 +/- 0.69 | <0.001        | 1.0 +/- 0.05  | >15 | <0.001        |
| <b>8t</b>  | SJ000311504 | 21 +/- 8.0    | 6.3 +/- 2.5   | >15           | >15 | >15           |
| <b>8u</b>  | SJ000311174 | 0.87 +/- 0.01 | 2.3 +/- 0.87  | 0.27 +/- 0.29 | >15 | 0.41 +/- 0.32 |
| <b>8v</b>  | SJ000311509 | 0.95 +/- 0.12 | 0.02 +/- 0.02 | 0.27 +/- 0.33 | >15 | 0.10 +/- 0.14 |
| <b>8w</b>  | SJ000311508 | 14 +/- 10     | 8.8 +/- 8.8   | >15           | >15 | >15           |
| <b>8x</b>  | SJ000311498 | >15           | >15           | >15           | >15 | >15           |
| <b>8y</b>  | SJ000311512 | >15           | >15           | >15           | >15 | >15           |
| <b>8z</b>  | SJ000311499 | 0.26 +/- 0.06 | 0.01 +/- 0.01 | 0.02 +/- 0.25 | >15 | <0.001        |
| <b>8aa</b> | SJ000311503 | 0.13 +/- 0.02 | 0.29 +/- 0.12 | <0.001        | >15 | <0.001        |

**Table S2. SAR of 4(1H)-quinolone derivatives 9-14**

| CMPD       | SJNumber    | Average                           | Average                            | Average                            | Average                                      | Average                                         |
|------------|-------------|-----------------------------------|------------------------------------|------------------------------------|----------------------------------------------|-------------------------------------------------|
|            |             | EC <sub>50</sub> K1<br>( $\mu$ M) | EC <sub>50</sub> C2B<br>( $\mu$ M) | EC <sub>50</sub><br>D10 ( $\mu$ M) | EC <sub>50</sub><br>D10_yDHO<br>D ( $\mu$ M) | EC <sub>50</sub><br>D10_yDHOD<br>+PG ( $\mu$ M) |
| <b>9a</b>  | SJ000358773 | 6.6 +/- 7.6E6                     | >15                                | >15                                | >15                                          | >15                                             |
| <b>9b</b>  | SJ000358775 | 0.08 +/- 0.03                     | <0.001                             | <0.001                             | >15                                          | <0.001                                          |
| <b>9c</b>  | SJ000358774 | 2.2 +/- 1.7                       | 1.6 +/- 0.59                       | 0.65 +/- 0.43                      | >15                                          | 0.42 +/- 0.02                                   |
| <b>10a</b> | SJ000311864 | >15                               | >15                                | >15                                | >15                                          | >15                                             |
| <b>10b</b> | SJ000311858 | 1.3 +/- 0.05                      | >15                                | >15                                | >15                                          | >15                                             |
| <b>10c</b> | SJ000311860 | >15                               | 5.8 +/- 1.1                        | 4.9 +/- 1.5                        | >15                                          | 9.4 +/- 7.9                                     |
| <b>11a</b> | SJ000311863 | >15                               | >15                                | >15                                | >15                                          | >15                                             |
| <b>11b</b> | SJ000311857 | 3.4 +/- 0.91                      | >15                                | >15                                | >15                                          | >15                                             |
| <b>11c</b> | SJ000311859 | >15                               | >15                                | >15                                | >15                                          | 3.3 +/- 0.36                                    |
| <b>11d</b> | SJ000311855 | >15                               | >15                                | >15                                | >15                                          | >15                                             |
| <b>12a</b> | SJ000520033 | 0.12 +/- 0.01                     | 0.01 +/- 0.01                      | 0.06 +/- 0.03                      | >15                                          | 0.02 +/- 0.01                                   |
| <b>12b</b> | SJ000520034 | 0.18 +/- 0.04                     | 0.22 +/- 0.08                      | 0.06 +/- 0.58                      | >15                                          | 0.04 +/- 0.01                                   |
| <b>13</b>  | SJ000358776 | 0.38 +/- 0.13                     | <0.001                             | 0.20 +/- 0.14                      | >15                                          | <0.001                                          |

|           |             |               |              |             |     |              |
|-----------|-------------|---------------|--------------|-------------|-----|--------------|
| <b>14</b> | SJ000358771 | 0.28 +/- 0.05 | 5.1 +/- 0.02 | 1.3 +/- 1.2 | >15 | 1.6 +/- 0.34 |
|-----------|-------------|---------------|--------------|-------------|-----|--------------|

**Table S3. SAR of 4(1H)-quinolone derivatives 15-20**

| <b>CMPD</b> | <b>SJNumber</b> | <b>Average<br/>EC<sub>50</sub> K1 (μM)</b> | <b>Average<br/>EC<sub>50</sub> C2B<br/>(μM)</b> | <b>Average<br/>EC<sub>50</sub><br/>D10 (μM)</b> | <b>Average<br/>EC<sub>50</sub><br/>D10_yDHOD<br/>(μM)</b> | <b>Average<br/>EC<sub>50</sub><br/>D10_yDHOD+PG<br/>(μM)</b> |
|-------------|-----------------|--------------------------------------------|-------------------------------------------------|-------------------------------------------------|-----------------------------------------------------------|--------------------------------------------------------------|
| <b>15a</b>  | SJ000520043     | 0.04 +/- 0.01                              | >15                                             | 0.02 +/- 0.02                                   | >15                                                       | 0.01 +/- 0.01                                                |
| <b>15b</b>  | SJ000520044     | 0.06 +/- 0.01                              | >15                                             | 0.06 +/- 0.60                                   | >15                                                       | 0.05 +/- 0.03                                                |
| <b>15c</b>  | SJ000520048     | 0.01 +/- 0.01                              | 1.2 +/- 0.04                                    | 0.01 +/- 0.01                                   | >15                                                       | 0.01 +/- 0.01                                                |
| <b>15d</b>  | SJ000520047     | 0.36 +/- 0.01                              | >15                                             | 0.33 +/- 0.18                                   | >15                                                       | 0.58 +/- 0.28                                                |
| <b>16a</b>  | SJ000515468     | >15                                        | >15                                             | >15                                             | >15                                                       | >15                                                          |
| <b>16b</b>  | SJ000515469     | 0.38 +/- 0.13                              | 0.03 +/- 0.01                                   | 0.35 +/- 0.26                                   | >15                                                       | 0.08 +/- 0.01                                                |
| <b>16c</b>  | SJ000515470     | >15                                        | >15                                             | >15                                             | >15                                                       | >15                                                          |
| <b>16d</b>  | SJ000515471     | 1.5 +/- 0.72                               | 0.47 +/- 0.20                                   | 1.4 +/- 0.21                                    | >15                                                       | 0.50 +/- 0.05                                                |
| <b>17a</b>  | SJ000515472     | >15                                        | >15                                             | >15                                             | >15                                                       | >15                                                          |
| <b>17b</b>  | SJ000515473     | >15                                        | >15                                             | >15                                             | >15                                                       | >15                                                          |

---

|            |             |                |               |               |     |                |
|------------|-------------|----------------|---------------|---------------|-----|----------------|
| <b>17c</b> | SJ000515474 | >15            | 1.5 +/- 0.62  | >15           | >15 | 6.9 +/- 5.4    |
| <b>17d</b> | SJ000515475 | >15            | >15           | >15           | >15 | >15            |
| <b>18a</b> | SJ000515476 | 0.10 +/- 0.18  | >15           | 0.14 +/- 0.03 | >15 | 0.16 +/- 0.03  |
| <b>18b</b> | SJ000515477 | 0.23 +/- 0.20  | 0.02 +/- 0.01 | 0.17 +/- 0.15 | >15 | 0.04 +/- 0.01  |
| <b>18c</b> | SJ000515478 | 0.54 +/- 0.17  | >15           | 0.66 +/- 0.21 | >15 | 0.34 +/- 0.16  |
| <b>18d</b> | SJ000515479 | 0.05 +/- 0.02  | >15           | 0.05 +/- 0.01 | >15 | 0.05 +/- 0.01  |
| <b>19a</b> | SJ000515480 | 0.03 +/- 0.01  | 0.05 +/- 0.01 | 0.03 +/- 0.01 | >15 | 0.035 +/- 0.01 |
| <b>19b</b> | SJ000515481 | 0.02 +/- 0.01  | 0.01 +/- 0.01 | 0.02 +/- 0.01 | >15 | 0.004 +/- 0.01 |
| <b>19c</b> | SJ000515482 | 0.06 +/- 0.01  | 0.12 +/- 0.03 | 0.05 +/- 0.06 | >15 | 0.07 +/- 0.01  |
| <b>19d</b> | SJ000515483 | 0.01 +/- 0.011 | 0.01 +/- 0.01 | 0.01 +/- 0.01 | >15 | 0.002 +/- 0.01 |
| <b>19e</b> | SJ000544646 | 0.17 +/- 0.01  | 0.11 +/- 0.14 | 0.13 +/- 0.05 | >15 | 0.13 +/- 0.02  |
| <b>19f</b> | SJ000544647 | 0.18 +/- 0.02  | 0.12 +/- 0.05 | 0.11 +/- 0.03 | >15 | 0.11 +/- 0.02  |
| <b>19g</b> | SJ000520051 | 0.03 +/- 0.01  | 0.03 +/- 0.01 | 0.02 +/- 0.13 | >15 | 0.02 +/- 0.01  |
| <b>20a</b> | SJ000520036 | 0.21 +/- 0.01  | 0.55 +/- 0.12 | 0.12 +/- 0.07 | >15 | 0.12 +/- 0.01  |
| <b>20b</b> | SJ000520041 | 0.01 +/- 0.01  | <0.001        | 0.01 +/- 0.01 | >15 | <0.001         |
| <b>20c</b> | SJ000520037 | 0.09 +/- 0.01  | 0.17 +/- 0.05 | 0.06 +/- 0.56 | >15 | 0.05 +/- 0.01  |
| <b>20d</b> | SJ000520050 | 0.01 +/- 0.01  | 0.01 +/- 0.01 | 0.01 +/- 0.01 | >15 | 0.01 +/- 0.01  |
| <b>20e</b> | SJ000520049 | 0.13 +/- 0.02  | 0.10 +/- 0.02 | 0.09 +/- 0.39 | >15 | 0.09 +/- 0.01  |

---

---

|            |             |               |                |               |     |                   |
|------------|-------------|---------------|----------------|---------------|-----|-------------------|
| <b>20f</b> | SJ000520039 | 0.95 +/- 0.07 | 1.9 +/- 0.14   | 0.87 +/- 0.51 | >15 | 1.1 +/- 0.09      |
| <b>20g</b> | SJ000520040 | 0.08 +/- 0.1  | 0.20 +/- 0.07  | 0.05 +/- 0.02 | >15 | 0.07 +/- 0.01     |
| <b>20h</b> | SJ000544648 | 0.12 +/- 0.01 | 0.15 +/- 0.02  | 0.10 +/- 0.02 | >15 | 0.11 +/- 0.01     |
| <b>20i</b> | SJ000520038 | 0.04 +/- 0.01 | 0.05 +/- 0.01  | 0.03 +/- 0.03 | >15 | 0.03 +/- 0.01     |
| <b>20j</b> | SJ000520829 | 0.20 +/- 0.02 | 0.01 +/- 0.01  | 0.03 +/- 0.01 | >15 | 0.01 +/- 0.000849 |
| <b>20k</b> | SJ000520830 | 0.02 +/- 0.01 | <0.001         | 0.01 +/- 0.01 | >15 | <0.001            |
| <b>20l</b> | SJ000520831 | 0.08 +/- 0.01 | 0.01 +/- 0.002 | 0.03 +/- 0.01 | >15 | 0.01 +/- 0.01     |
| <b>20m</b> | SJ000544645 | >15           | >15            | >15           | >15 | >15               |
| <b>20n</b> | SJ000544643 | 0.29 +/- 0.04 | 0.08 +/- 0.01  | 0.19 +/- 0.04 | >15 | 0.13 +/- 0.01     |

---

**Table S4. SAR of 4(1H)-quinolone derivatives 27-28**

| CMPD       | SJNumber    | Average                     | Average                      | Average                      | Average                                   | Average                                      |
|------------|-------------|-----------------------------|------------------------------|------------------------------|-------------------------------------------|----------------------------------------------|
|            |             | EC <sub>50</sub> K1<br>(μM) | EC <sub>50</sub> C2B<br>(μM) | EC <sub>50</sub><br>D10 (μM) | EC <sub>50</sub><br>D10_yDHO<br>D<br>(μM) | EC <sub>50</sub><br>D10_yDHOD+<br>PG<br>(μM) |
| <b>27a</b> | SJ000520183 | 0.53 +/- 0.05               | 0.11 +/- 0.07                | 0.22 +/- 0.07                | >15                                       | 0.07 +/- 0.01                                |
| <b>27b</b> | SJ000520042 | 0.35 +/- 0.06               | 0.08 +/- 0.05                | 0.16 +/- 0.08                | >15                                       | 0.09 +/- 0.04                                |
| <b>27c</b> | SJ000520184 | 0.64 +/- 0.01               | 0.45 +/- 0.14                | 0.34 +/- 0.10                | >15                                       | 0.24 +/- 0.03                                |
| <b>27d</b> | SJ000520185 | 6.3 +/- 2.4                 | >15                          | >15                          | 6.5 +/- 0.67                              | 8.8 +/- 8.8                                  |
| <b>27e</b> | SJ000520186 | >15                         | >15                          | 1.1 +/- 0.47                 | >15                                       | 0.66 +/- 0.09                                |
| <b>28a</b> | SJ000520827 | 0.82 +/- 0.23               | 0.04 +/- 0.01                | 0.15 +/- 0.01                | >15                                       | 0.07 +/- 0.01                                |
| <b>28b</b> | SJ000520826 | 0.16 +/- 0.07               | 0.02 +/- 0.01                | 0.07 +/- 0.01                | >15                                       | 0.04 +/- 0.01                                |
| <b>28c</b> | SJ000556728 | 0.52 +/- 0.26               | 0.18 +/- 0.06                | 0.19 +/- 0.07                | >15                                       | 0.12 +/- 0.01                                |
| <b>28d</b> | SJ000556725 | 7.3 +/- 4.3                 | 0.10 +/- 0.01                | >15                          | >15                                       | 0.34 +/- 0.02                                |
| <b>28e</b> | SJ000556727 | >15                         | 1.8 +/- 1.5                  | >15                          | >15                                       | 8.5 +/- 9.1                                  |

---

|            |             |               |               |               |     |               |
|------------|-------------|---------------|---------------|---------------|-----|---------------|
| <b>28f</b> | SJ000556726 | >15           | >15           | >15           | >15 | >15           |
| <b>28g</b> | SJ000520828 | 0.10 +/- 0.01 | 0.05 +/- 0.01 | 0.03 +/- 0.01 | >15 | 0.03 +/- 0.01 |
| <b>28h</b> | SJ000544644 | 0.42 +/- 0.19 | 0.11 +/- 0.01 | 0.22 +/- 0.01 | >15 | 0.16 +/- 0.01 |

---



Figure S1. Heat map for Antimalarial activity, permeability and solubility of quinolone derivatives 8-20 and 27-28

| CMPD_number | K1 ( $\mu\text{M}$ ) | TM90-C2B ( $\mu\text{M}$ ) | D10 ( $\mu\text{M}$ ) | D10_YDHOD ( $\mu\text{M}$ ) | D10_YDHOD+PG ( $\mu\text{M}$ ) | Permeability at pH7.4 (Pe) | Solubility at pH7.4 ( $\mu\text{M}$ ) | HeK293 ( $\mu\text{M}$ ) | HepG2 ( $\mu\text{M}$ ) | Raji ( $\mu\text{M}$ ) | BJ ( $\mu\text{M}$ ) |
|-------------|----------------------|----------------------------|-----------------------|-----------------------------|--------------------------------|----------------------------|---------------------------------------|--------------------------|-------------------------|------------------------|----------------------|
| 8a          | 0.258                | 0.576                      | 0.082                 | >15                         | 0.079                          | 100                        | 14.4                                  | >21.5                    | >21.5                   | >21.5                  | >21.5                |
| 8b          | 0.822                | >15                        | 0.368                 | >15                         | >15                            | 194                        | 76.5                                  | >21.5                    | >21.5                   | >21.5                  | >21.5                |
| 8c          | 0.302                | 0.016                      | 0.016                 | >15                         | <0.001                         | 227                        | 47.8                                  | >21.5                    | >21.5                   | >21.5                  | >21.5                |
| 8d          | 0.225                | 0.091                      | <0.001                | >15                         | <0.001                         | 465                        | 5.9                                   | >21.5                    | >21.5                   | >21.5                  | >21.5                |
| 8e          | 0.071                | <0.001                     | <0.001                | >15                         | <0.001                         | 2912                       | 0.2                                   | >21.5                    | >21.5                   | >21.5                  | >21.5                |
| 8f          | 0.127                | 0.253                      | 0.069                 | >15                         | <0.001                         | 172                        | 74.1                                  | >21.5                    | >21.5                   | >21.5                  | >21.5                |
| 8g          | 0.065                | 0.001                      | <0.001                | >15                         | <0.001                         | 259                        | 8.7                                   | >21.5                    | >21.5                   | >21.5                  | >21.5                |
| 8h          | 0.022                | <0.001                     | <0.001                | >15                         | <0.001                         | 336                        | 5.8                                   | >21.5                    | >21.5                   | >21.5                  | >21.5                |
| 8i          | 0.158                | <0.001                     | <0.001                | >15                         | <0.001                         | 529                        | 14.2                                  | >21.5                    | >21.5                   | >21.5                  | >21.5                |
| 8j          | 0.026                | <0.001                     | <0.001                | >15                         | <0.001                         | 984                        | 11.3                                  | >21.5                    | >21.5                   | >21.5                  | >21.5                |
| 8k          | 0.044                | <0.001                     | 0.002                 | >15                         | <0.001                         | 949                        | 1.0                                   | >21.5                    | >21.5                   | >21.5                  | >21.5                |
| 8l          | 0.076                | <0.001                     | <0.001                | >15                         | <0.001                         | 313                        | 2.9                                   | >21.5                    | >21.5                   | >21.5                  | >21.5                |
| 8m          | 0.034                | <0.001                     | <0.001                | >15                         | <0.001                         | 746                        | 4.3                                   | >21.5                    | >21.5                   | >21.5                  | >21.5                |
| 8n          | 0.107                | <0.001                     | <0.001                | >15                         | <0.001                         | 558                        | 35.7                                  | >21.5                    | >21.5                   | >21.5                  | >21.5                |
| 8o          | 0.220                | 0.007                      | 0.004                 | 1.049                       | <0.001                         | 569                        | 19.2                                  | >21.5                    | >21.5                   | >21.5                  | >21.5                |
| 8p          | 0.553                | >15                        | 0.349                 | >15                         | 0.200                          | 188                        | 74.4                                  | >21.5                    | >21.5                   | >21.5                  | >21.5                |
| 8q          | 0.181                | >15                        | <0.001                | >15                         | <0.001                         | 948                        | 58.3                                  | >21.5                    | >21.5                   | >21.5                  | >21.5                |
| 8s          | 0.127                | <0.001                     | <0.001                | >15                         | <0.001                         | 895                        | 48.1                                  | >21.5                    | >21.5                   | >21.5                  | >21.5                |
| 8r          | 1.467                | 0.812                      | 0.716                 | >15                         | 0.459                          | 139                        | 86.8                                  | >21.5                    | >21.5                   | >21.5                  | >21.5                |
| 8t          | 21.015               | 6.095                      | >15                   | >15                         | >15                            | 46                         | 88.3                                  | >21.5                    | >21.5                   | >21.5                  | >21.5                |
| 8u          | 0.871                | 2.143                      | 0.423                 | >15                         | 0.404                          | 397                        | 13.2                                  | >21.5                    | >21.5                   | >21.5                  | >21.5                |
| 8v          | 0.948                | 0.033                      | 0.290                 | >15                         | 0.088                          | 184                        | 37.4                                  | >21.5                    | >21.5                   | >21.5                  | >21.5                |
| 8w          | 13.487               | 4.115                      | >15                   | >15                         | >15                            | 29                         | 87.2                                  | >21.5                    | >21.5                   | >21.5                  | >21.5                |
| 8x          | >15                  | >15                        | >15                   | >15                         | >15                            | 98                         | 92.1                                  | >21.5                    | >21.5                   | >21.5                  | >21.5                |
| 8y          | >15                  | >15                        | >15                   | >15                         | >15                            | 48                         | 90.8                                  | >21.5                    | >21.5                   | >21.5                  | >21.5                |
| 8z          | 0.259                | 0.015                      | 0.026                 | >15                         | 0.020                          | 239                        | 19.9                                  | >21.5                    | >21.5                   | >21.5                  | >21.5                |
| 8aa         | 0.130                | 0.413                      | <0.001                | >15                         | <0.001                         | 503                        | 60.3                                  | >21.5                    | >21.5                   | >21.5                  | >21.5                |
| 9a          | 6.618                | >15                        | >15                   | >15                         | 3.741                          | 56                         | 0.5                                   | >21.5                    | >21.5                   | >21.5                  | >21.5                |
| 9b          | 0.081                | <0.001                     | <0.001                | 8.704                       | <0.001                         | 670                        | 0.5                                   | >21.5                    | >21.5                   | >21.5                  | >21.5                |
| 9c          | 2.206                | 2.261                      | 1.283                 | >15                         | 0.408                          | 460                        | 4.2                                   | >21.5                    | >21.5                   | >21.5                  | >21.5                |
| 10a         | >15                  | >15                        | >15                   | 10.089                      | >15                            | 1046                       | 0.9                                   | >21.5                    | >21.5                   | >21.5                  | >21.5                |
| 10b         | 1.305                | >15                        | >15                   | >15                         | >15                            | 758                        | 1.9                                   | >21.5                    | >21.5                   | >21.5                  | >21.5                |
| 10c         | >15                  | 5.740                      | 4.132                 | 7.683                       | 3.162                          | 1020                       | 0.3                                   | >21.5                    | >21.5                   | >21.5                  | >21.5                |

| CMPD_number | K1 (µM) | TM90-C2B (µM) | D10 (µM) | D10_YDHOD (µM) | D10_YDHOD+PG (µM) | Permeability at pH7.4 (Pe) | Solubility at pH7.4 (µM) | HeK293 (µM) | HepG2 (µM) | Raji (µM) | BJ (µM) |
|-------------|---------|---------------|----------|----------------|-------------------|----------------------------|--------------------------|-------------|------------|-----------|---------|
| 11a         | >15     | >15           | >15      | >15            | >15               | 530                        | 24.4                     | >21.5       | >21.5      | >21.5     | >21.5   |
| 11b         | 3.369   | >15           | >15      | >15            | >15               | 615                        | 9.4                      | >21.5       | >21.5      | >21.5     | >21.5   |
| 11c         | >15     | >15           | >15      | 12.363         | >15               | 1351                       | 3.8                      | >21.5       | >21.5      | >21.5     | >21.5   |
| 11d         | >15     | >15           | >15      | >15            | >15               | 1168                       | 11.7                     | >21.5       | >21.5      | >21.5     | >21.5   |
| 12a         | 0.117   | 0.008         | 0.063    | >15            | 0.026             | 846                        | 7.2                      | >21.5       | >21.5      | >21.5     | >21.5   |
| 12b         | 0.175   | 0.161         | 0.068    | >15            | 0.044             | 706                        | 1.2                      | >21.5       | >21.5      | >21.5     | >21.5   |
| 13          | 0.380   | <0.001        | 0.184    | 9.625          | <0.001            | 514                        | 2.2                      | >21.5       | >21.5      | >21.5     | >21.5   |
| 14          | 0.277   | 4.878         | 1.549    | >15            | 1.202             | 882                        | 2.8                      | >21.5       | >21.5      | >21.5     | >21.5   |
| 15a         | 0.038   | >15           | 0.021    | >15            | 0.015             | 153                        | 25.3                     | >21.5       | >21.5      | >21.5     | >21.5   |
| 15b         | 0.060   | >15           | 0.090    | >15            | 0.068             | 161                        | 15.5                     | >21.5       | >21.5      | >21.5     | >21.5   |
| 15c         | 0.011   | 1.662         | 0.008    | >15            | 0.007             | 808                        | 3.1                      | >21.5       | >21.5      | >21.5     | >21.5   |
| 15d         | 0.365   | >15           | 0.392    | >15            | 0.536             | 808                        | 16.9                     | >21.5       | >21.5      | >21.5     | >21.5   |
| 16a         | >15     | >15           | >15      | >15            | >15               | 70                         | 45.4                     | >21.5       | >21.5      | >21.5     | >21.5   |
| 16b         | 0.381   | 0.021         | 0.242    | >15            | 0.076             | 1095                       | 0.5                      | >21.5       | >21.5      | >21.5     | >21.5   |
| 16c         | >15     | >15           | >15      | >15            | >15               | 134                        | 6.9                      | >21.5       | >21.5      | >21.5     | >21.5   |
| 16d         | 1.502   | 0.351         | 1.131    | >15            | 0.477             | 641                        | 45.4                     | >21.5       | >21.5      | >21.5     | >21.5   |
| 17a         | >15     | >15           | >15      | >15            | >15               | 173                        | 73.1                     | >21.5       | >21.5      | >21.5     | >21.5   |
| 17b         | >15     | >15           | >15      | >15            | >15               | 449                        | 27.8                     | >21.5       | >21.5      | >21.5     | >21.5   |
| 17c         | >15     | >15           | >15      | >15            | >15               | 445                        | 10.3                     | >21.5       | >21.5      | >21.5     | >21.5   |
| 17d         | >15     | >15           | >15      | >15            | >15               | 0                          | 1.4                      | >21.5       | >21.5      | >21.5     | >21.5   |
| 18a         | 0.102   | >15           | 0.143    | >15            | 0.143             | 0                          | 1.2                      | >21.5       | >21.5      | >21.5     | >21.5   |
| 18b         | 0.234   | 0.019         | 0.087    | >15            | 0.040             | 221                        | 27.2                     | >21.5       | >21.5      | >21.5     | >21.5   |
| 18c         | 0.544   | >15           | 0.576    | >15            | 0.396             | 1199                       | 0.2                      | >21.5       | >21.5      | >21.5     | >21.5   |
| 18d         | 0.053   | >15           | 0.037    | >15            | 0.042             | 7                          | 0.1                      | >21.5       | >21.5      | >21.5     | >21.5   |
| 19a         | 0.026   | 0.055         | 0.031    | >15            | 0.027             | 366                        | 9.4                      | >21.5       | >21.5      | >21.5     | >21.5   |
| 19b         | 0.017   | 0.004         | 0.013    | >15            | 0.003             | 218                        | 0.9                      | >21.5       | >21.5      | >21.5     | >21.5   |
| 19c         | 0.063   | 0.123         | 0.084    | >15            | 0.060             | 435                        | 13.3                     | >21.5       | >21.5      | >21.5     | >21.5   |
| 19d         | 0.004   | 0.004         | 0.004    | >15            | 0.004             | 19                         | 0.1                      | >21.5       | >21.5      | >21.5     | >21.5   |
| 19e         | 0.175   | 0.146         | 0.124    | >15            | 0.125             | 682                        | 4.5                      | >21.5       | >21.5      | >21.5     | >21.5   |
| 19f         | 0.179   | 0.136         | 0.114    | >15            | 0.113             | 476                        | 7.2                      | >21.5       | >21.5      | >21.5     | >21.5   |
| 19g         | 0.028   | 0.021         | 0.025    | >15            | 0.022             | 788                        | 4.5                      | >21.5       | >21.5      | >21.5     | >21.5   |
| 20a         | 0.213   | 0.404         | 0.128    | >15            | 0.119             | 248                        | 46.3                     | >21.5       | >21.5      | >21.5     | >21.5   |
| 20b         | 0.008   | <0.001        | 0.007    | >15            | 0.004             | 250                        | 3.7                      | >21.5       | >21.5      | >21.5     | >21.5   |
| 20c         | 0.085   | 0.133         | 0.068    | >15            | 0.055             | 287                        | 8.5                      | >21.5       | >21.5      | >21.5     | >21.5   |
| 20d         | 0.010   | 0.009         | 0.007    | >15            | 0.008             | 557                        | 4.3                      | >21.5       | >21.5      | >21.5     | >21.5   |
| 20e         | 0.134   | 0.079         | 0.107    | >15            | 0.084             | 571                        | 17.4                     | >21.5       | >21.5      | >21.5     | >21.5   |

| CMPD_number | K1 (μM) | TM90-C2B (μM) | D10 (μM) | D10_YDHOD (μM) | D10_YDHOD+PG (μM) | Permeability at pH7.4 (Pe) | Solubility at pH7.4 (μM) | Hek293 (μM) | HepG2 (μM) | Raji (μM) | BJ (μM) |
|-------------|---------|---------------|----------|----------------|-------------------|----------------------------|--------------------------|-------------|------------|-----------|---------|
| 20f         | 0.955   | 4.580         | 0.863    | >15            | 1.006             | 226                        | 28.1                     | >21.5       | >21.5      | >21.5     | >21.5   |
| 20g         | 0.083   | 0.274         | 0.061    | >15            | 0.071             | 407                        | 20.3                     | >21.5       | >21.5      | >21.5     | >21.5   |
| 20h         | 0.117   | 0.153         | 0.095    | >15            | 0.111             | 669                        | 7.3                      | >21.5       | >21.5      | >21.5     | >21.5   |
| 20i         | 0.038   | 0.048         | 0.042    | >15            | 0.039             | 227                        | 7.5                      | >21.5       | >21.5      | >21.5     | >21.5   |
| 20j         | 0.199   | 0.004         | 0.027    | >15            | 0.008             | 154                        | 0.2                      | >21.5       | >21.5      | >21.5     | >21.5   |
| 20k         | 0.022   | <0.001        | 0.005    | >15            | <0.001            | 114                        | 0.1                      | >21.5       | >21.5      | >21.5     | >21.5   |
| 20l         | 0.077   | 0.003         | 0.024    | >15            | 0.012             | 935                        | <0.2                     | >21.5       | >21.5      | >21.5     | >21.5   |
| 20m         | >15     | >15           | >15      | >15            | >15               | 175                        | 5.7                      | >21.5       | >21.5      | >21.5     | >21.5   |
| 20n         | 0.286   | 0.078         | 0.188    | >15            | 0.122             | 734                        | 4.0                      | >21.5       | >21.5      | >21.5     | >21.5   |
| 27a         | 0.535   | 0.058         | 0.207    | >15            | 0.078             | 833                        | 19.2                     | >21.5       | >21.5      | >21.5     | >21.5   |
| 27b         | 0.354   | 0.038         | 0.151    | >15            | 0.063             | 884                        | 15.8                     | >21.5       | >21.5      | >21.5     | >21.5   |
| 27c         | 0.643   | 0.364         | 0.367    | >15            | 0.263             | 1578                       | 72.0                     | >21.5       | >21.5      | >21.5     | >21.5   |
| 27d         | 6.291   | 1.595         | >15      | 6.894          | >15               | 1310                       | 93.2                     | >21.5       | >21.5      | >21.5     | >21.5   |
| 27e         | >15     | 0.607         | 0.955    | >15            | 0.703             | 1145                       | 94.3                     | >21.5       | >21.5      | >21.5     | >21.5   |
| 28a         | 0.821   | 0.035         | 0.155    | >15            | 0.073             | 840                        | 3.4                      | >21.5       | >21.5      | >21.5     | >21.5   |
| 28b         | 0.163   | 0.021         | 0.073    | >15            | 0.039             | 881                        | 3.4                      | >21.5       | >21.5      | >21.5     | >21.5   |
| 28c         | 0.523   | 0.169         | 0.191    | >15            | 0.116             | 1023                       | 52.3                     | >21.5       | >21.5      | >21.5     | >21.5   |
| 28d         | 4.274   | 0.106         | >15      | >15            | 0.342             | 395                        | 55.7                     | >21.5       | >21.5      | >21.5     | >21.5   |
| 28e         | >15     | 0.889         | >15      | >15            | >15               | 330                        | 57.1                     | >21.5       | >21.5      | >21.5     | >21.5   |
| 28f         | >15     | >15           | >15      | >15            | >15               | 5                          | 51.8                     | >21.5       | >21.5      | >21.5     | >21.5   |
| 28g         | 0.104   | 0.046         | 0.033    | >15            | 0.029             | 1308                       | 0.4                      | >21.5       | >21.5      | >21.5     | >21.5   |
| 28h         | 0.418   | 0.107         | 0.227    | >15            | 0.159             | 623                        | 3.1                      | >21.5       | >21.5      | >21.5     | >21.5   |
| Atovaquone  | 0.015   | >1.5015       | 0.016    | >1.5           | 0.002             |                            |                          |             |            |           |         |

| EC <sub>50</sub> (uM) | Permeability (Pe) | uSol (uM) | Cytotoxicity (uM) |
|-----------------------|-------------------|-----------|-------------------|
| <0.02                 | >1000             | > 50      | <1                |
| 0.02-0.1              | 300-1000          | 10-50     | 1-10              |
| 0.1-1                 | 50-300            | 1-10      | 10-20             |
| 1-5                   | 10-50             | <1        | >20               |
| 5-15                  | <10               |           |                   |
| >15                   |                   |           |                   |

1) Data represent median EC<sub>50</sub> values of parasite growth inhibition against a panel of *Plasmodium falciparum* strains, from replicate experiments, shown in a color gradient scale with darker squares indicating a higher antimalarial potency. The positive control for the antimalarial assay was atovaquone.

2) PAMPA passive permeability assay results at pH 7.4 are shown in a color gradient with darker purple squares indicating a higher permeability.

3) Aqueous solubility at pH 7.4 in isotonic buffer is shown in brown scale, as with darker squares indicating a higher solubility.

**Table S5. PfDHOD inhibition assay.**

| Compound       | IC <sub>50</sub> (μm)   |
|----------------|-------------------------|
| DSM1 (control) | 0.042<br>(0.015 - 0.12) |
| <b>8p</b>      | >100                    |
| <b>20a</b>     | >30                     |
| <b>20d</b>     | >100                    |
| <b>20g</b>     | >100                    |

**Table S6. Plasma concentration of 20i in mouse after a single oral administration**

| Dose: 50 mg/kg |                              | Dose: 200 mg/kg |                              |
|----------------|------------------------------|-----------------|------------------------------|
| Time (hr)      | Plasma Concentration (ng/mL) | Time (hr)       | Plasma Concentration (ng/mL) |
| 0.08           | 73.7 ± 19.74                 | 0.08            | 269.72 ± 46.82               |
| 0.25           | 241.79 ± 54.11               | 0.25            | 619.35 ± 352.45              |
| 0.5            | 275.05 ± 86.94               | 0.5             | 592.01 ± 236.29              |
| 1              | 252.05 ± 47.95               | 1               | 536.44 ± 51.85               |
| 2              | 190.54 ± 55.64               | 2               | 423.51 ± 47.3                |
| 4              | 188.76 ± 34.01               | 4               | 344.75 ± 76.87               |
| 6              | 179.56 ± 87.99               | 6               | 415.87 ± 196.25              |
| 8              | 228.35 ± 15.11               | 8               | 481.29 ± 229.69              |
| 10             | 176.73 ± 77.79               | 10              | 344.64 ± 153.76              |
| 24             | 21.25                        | 24              | 42.98                        |

**Table S7. Plasma concentration of 20g in mouse after a single oral administration**

| Dose: 50 mg/kg |                              | Dose: 200 mg/kg |                              |
|----------------|------------------------------|-----------------|------------------------------|
| Time (hr)      | Plasma Concentration (ng/mL) | Time (hr)       | Plasma Concentration (ng/mL) |
| 0.08           | 1718.12 ± 1595.2             | 0.08            | 4329.54 ± 2100.28            |
| 0.25           | 12281.7 ± 2170.6             | 0.25            | 10101 ± 8418.03              |
| 0.5            | 14419.2 ± 2372.5             | 0.5             | 24783 ± 9857.04              |
| 1              | 11136.8 ± 2111.6             | 1               | 15424.7 ± 10570.76           |
| 2              | 4513.4 ± 1341.5              | 2               | 19371.6 ± 5527.17            |
| 4              | 2503.66 ± 1337.6             | 4               | 5601.5 ± 1170.14             |
| 6              | 1616.01 ± 738.71             | 6               | 3390.7 ± 470.11              |
| 8              | 1227.85 ± 384.53             | 8               | 5930.3 ± 4159.95             |
| 10             | 1648.64 ± 891.15             | 10              | 2289.5 ± 853.8               |
| 24             | 10                           | 24              | 446.09 ± 416                 |

**Table S8. Plasma concentration of 20h in mouse after a single oral administration**

| Dose: 50 mg/kg |                              | Dose: 200 mg/kg |                              |
|----------------|------------------------------|-----------------|------------------------------|
| Time (hr)      | Plasma Concentration (ng/mL) | Time (hr)       | Plasma Concentration (ng/mL) |
| 0.08           | 1240.05 ± 700.31             | 0.08            | 1952.12 ± 777.86             |
| 0.25           | 13079.2 ± 1094.5             | 0.25            | 10693.6 ± 2183.89            |
| 0.5            | 9057.87 ± 798.71             | 0.5             | 16137.1 ± 4160.57            |
| 1              | 7841.73 ± 577.84             | 1               | 16470.7 ± 3281.58            |
| 2              | 3966.48 ± 1663.76            | 2               | 11670.9 ± 1019.71            |
| 4              | 938.33 ± 189.06              | 4               | 6227.73 ± 1117.58            |
| 6              | 1120.35 ± 128.17             | 6               | 3333.5 ± 731.99              |
| 8              | 3277.41 ± 1418.83            | 8               | 2182.09 ± 873.51             |
| 10             | 882 ± 206.63                 | 10              | 551.32 ± 374.66              |
| 24             | < LLOQ                       | 24              | 64.92 ± 89.53                |

<sup>a</sup>LLOQ: Lower Limit Of Quantification (5 ng/ml)

**Table S9. Pharmacokinetic profiles of 8a, 8e, 8f, 8g, 8h, 8m, 20i, 20g, and 20h in mouse after a single oral administration.**

| Comound    | Dose (mg/kg) | C <sub>max</sub> (ng/mL) | T <sub>max</sub> (hr) | AUC <sub>last</sub> (hr·ng/mL) | AUC <sub>i:inf</sub> (hr·ng/mL) | MRT <sub>last</sub> (hr) | t <sub>1/2</sub> (hr) |
|------------|--------------|--------------------------|-----------------------|--------------------------------|---------------------------------|--------------------------|-----------------------|
| <b>8a</b>  | 30           | 546                      | 0.25                  | 2112                           | 2252                            | 2.4                      | 2.0                   |
|            | 200          | 1853                     | 0.25                  | 23533                          | 23840                           | 6.4                      | 3.9                   |
| <b>8e</b>  | 30           | 92.6                     | 2.0                   | 661                            | 676                             | 5.2                      | 4.2                   |
|            | 200          | 171                      | 1.0                   | 922                            | 1702                            | 3.6                      | 7.1                   |
| <b>8f</b>  | 30           | 2817                     | 0.25                  | 2814                           | 2837                            | 1.1                      | 1.3                   |
|            | 200          | 2046                     | 0.08                  | 2699                           | 2757                            | 2.4                      | 1.6                   |
| <b>8g</b>  | 30           | 684                      | 1.0                   | 1797                           | 1888                            | 2.0                      | 1.7                   |
|            | 200          | 883                      | 1.0                   | 3255                           | 3759                            | 2.7                      | 2.6                   |
| <b>8h</b>  | 30           | 114                      | 0.25                  | 438                            | 594                             | 3.0                      | 3.7                   |
|            | 200          | 684                      | 1.0                   | 1889                           | 2935                            | 2.7                      | 6.2                   |
| <b>8m</b>  | 30           | 24                       | 0.50                  | 36                             | 61                              | 0.9                      | 1.5                   |
|            | 200          | 167                      | 0.25                  | 376                            | 437                             | 2.8                      | 1.2                   |
| <b>20i</b> | 50           | 275 ± 50                 | 0.5                   | 3394 ± 377                     | 3602                            | 7.6                      | 6.8                   |
|            | 200          | 619 ± 203                | 0.25                  | 6965 ± 797                     | 7376                            | 7.5                      | 6.6                   |
| <b>20g</b> | 50           | 14419 ± 1370             | 0.5                   | 47278 ± 4371                   | 47313                           | 4.6                      | 2.5                   |
|            | 200          | 24783 ± 5691             | 0.5                   | 103866 ± 9492                  | 106770                          | 4.9                      | 4.5                   |
| <b>20h</b> | 50           | 13079 ± 632              | 0.25                  | 29684 ± 2205                   | 31717                           | 3.5                      | 1.6                   |
|            | 200          | 16471 ± 1895             | 1                     | 66752 ± 2333                   | 67030                           | 3.5                      | 3                     |

**Table S10. Efficacy of quinolone compound 20g and 20h in *P. berghei* infected mice after 3 days of oral dosing.<sup>a</sup>**

| compound          | dose (mg/kg) | % inhibition on day 6 | Mice dead/Day died           | Survival (days) |
|-------------------|--------------|-----------------------|------------------------------|-----------------|
| <b>20g</b>        | 10 × 3       | 2.32                  | 4/8, 1/22                    | 8-22            |
|                   | 30 × 3       | 57.2                  | 1/8, 1/12, 1/16, 1/17, 1/22  | 8-22            |
| <b>20h</b>        | 10 × 3       | 25.1                  | 3/8, 1/9, 1/14               | 8-14            |
|                   | 30 × 3       | 22.4                  | 1/6, 3/7, 1/8                | 6-8             |
| Amodiaquine       | 30           | 100                   | 1/15, 1/16, 1/17, 1/18, 1/23 | 15-23           |
| infected controls | none         | 0                     | 1/6, 2/7, 2/8                | 6-8             |

<sup>a</sup> The zero time point represents the day of infection; once daily oral dosing was performed at 72 hr, 96 hr and 120 hr post-infection. Five mice were dosed per group.

**Table S11. Hammett Constants Used in Study.**

| Hammett Substituent Constants ( $\sigma$ ) – Electronic Effects |               |               |                                                  |               |               |                                                 |               |               |
|-----------------------------------------------------------------|---------------|---------------|--------------------------------------------------|---------------|---------------|-------------------------------------------------|---------------|---------------|
| Substituent                                                     | meta $\sigma$ | para $\sigma$ | Substituent                                      | meta $\sigma$ | para $\sigma$ | Substituent                                     | meta $\sigma$ | para $\sigma$ |
| H                                                               | 0             | 0             | C(O)C <sub>6</sub> H <sub>5</sub>                | 0.34          | 0.43          | NO <sub>2</sub>                                 | 0.71          | 0.78          |
| CH <sub>3</sub>                                                 | -0.07         | -0.17         | CO <sub>2</sub> <sup>(-)</sup>                   | -0.10         | 0.00          | O <sup>(-)</sup>                                | -0.71         | -1.00         |
| CF <sub>3</sub>                                                 | 0.43          | 0.54          | CO <sub>2</sub> H                                | 0.36          | 0.41          | OH                                              | 0.12          | -0.37         |
| CCl <sub>3</sub>                                                | 0.4           | 0.46          | CO <sub>2</sub> CH <sub>3</sub>                  | 0.32          | 0.39          | OCH <sub>3</sub>                                | 0.12          | -0.27         |
| CH <sub>2</sub> CH <sub>3</sub>                                 | -0.07         | -0.15         | CO <sub>2</sub> CH <sub>2</sub> CH <sub>3</sub>  | 0.37          | 0.45          | OCH <sub>2</sub> CH <sub>3</sub>                | 0.10          | -0.24         |
| CH(CH <sub>3</sub> ) <sub>2</sub>                               | -0.07         | -0.17         | CO <sub>2</sub> C <sub>6</sub> H <sub>5</sub>    | 0.37          | 0.44          | O( <i>n</i> -C <sub>4</sub> H <sub>9</sub> )    | 0.10          | -0.32         |
| CH <sub>2</sub> CH <sub>2</sub> CH <sub>3</sub>                 | -0.07         | -0.13         | CONH <sub>2</sub>                                | 0.28          | 0.36          | O(C <sub>6</sub> H <sub>5</sub> )               | 0.25          | -0.03         |
| C <sub>3</sub> H <sub>5</sub><br>(cyclopropyl)                  | -0.07         | -0.21         | CONHCH <sub>3</sub>                              | 0.35          | 0.36          | OCF <sub>3</sub>                                | 0.40          | 0.35          |
| <i>n</i> C <sub>4</sub> H <sub>9</sub>                          | -0.08         | -0.16         | CON(CH <sub>3</sub> ) <sub>2</sub>               | 0.35          | 0.36          | OCOCH <sub>3</sub>                              | 0.39          | 0.31          |
| C(CH <sub>3</sub> ) <sub>3</sub>                                | -0.10         | -0.20         | NH <sub>2</sub>                                  | -0.16         | -0.66         | OC(O)C <sub>6</sub> H <sub>5</sub>              | 0.21          | 0.13          |
| <i>n</i> C <sub>5</sub> H <sub>11</sub><br>( <i>n</i> -pentyl)  | -0.08         | -0.16         | N <sup>(+)</sup> H <sub>3</sub>                  | 0.86          | 0.6           | SH                                              | 0.25          | 0.15          |
| C <sub>6</sub> H <sub>5</sub>                                   | 0.06          | -0.01         | NHCH <sub>3</sub>                                | -0.21         | -0.7          | SCH <sub>3</sub>                                | 0.15          | 0.00          |
| <i>c</i> -C <sub>6</sub> H <sub>11</sub>                        | -0.15         | -0.22         | NH(CH <sub>2</sub> CH <sub>3</sub> )             | -0.24         | -0.61         | SCH <sub>2</sub> CH <sub>3</sub>                | 0.18          | 0.03          |
| CH <sub>2</sub> C <sub>6</sub> H <sub>5</sub>                   | -0.08         | -0.09         | NH(C <sub>6</sub> H <sub>5</sub> )               | -0.12         | -0.40         | SC <sub>6</sub> H <sub>5</sub>                  | 0.23          | 0.07          |
| CH <sub>2</sub> OCH <sub>3</sub>                                | 0.02          | 0.03          | NHCOCH <sub>3</sub>                              | 0.21          | 0.00          | SOCH <sub>2</sub> CH <sub>3</sub>               | 0.52          | 0.49          |
| CH <sub>2</sub> OC <sub>6</sub> H <sub>5</sub>                  | 0.03          | 0.04          | NHC(O)C <sub>6</sub> H <sub>5</sub>              | 0.02          | -0.19         | SO <sub>3</sub> <sup>(-)</sup>                  | 0.05          | 0.09          |
| CH <sub>2</sub> NH <sub>2</sub>                                 | 0.15          | 0             | NHNH <sub>2</sub>                                | 0.02          | -0.55         | SO <sub>2</sub> CH <sub>3</sub>                 | 0.60          | 0.72          |
| CH <sub>2</sub> <sup>(+)</sup> NH <sub>3</sub>                  | 0.3           | 0.3           | NHOH                                             | -0.04         | -0.34         | SO <sub>2</sub> CH <sub>2</sub> CH <sub>3</sub> | 0.60          | 0.72          |
| 1-pyrrolyl                                                      | 0.47          | 0.37          | NHSO <sub>2</sub> CH <sub>3</sub>                | 0.2           | 0.03          | SO <sub>2</sub> C <sub>6</sub> H <sub>5</sub>   | 0.61          | 0.70          |
| 2-thienyl                                                       | 0.09          | 0.05          | NHSO <sub>2</sub> C <sub>6</sub> H <sub>5</sub>  | 0.16          | 0.01          | SO <sub>2</sub> CF <sub>3</sub>                 | 0.83          | 0.96          |
| 3-thienyl                                                       | 0.03          | -0.02         | N(CH <sub>3</sub> ) <sub>2</sub>                 | -0.21         | -0.83         | SO <sub>2</sub> NH <sub>2</sub>                 | 0.46          | 0.57          |
| 2-benzthiazolyl                                                 | 0.27          | 0.29          | N(CH <sub>2</sub> CH <sub>3</sub> ) <sub>2</sub> | -0.23         | -0.90         | F                                               | 0.34          | 0.06          |
| CN                                                              | 0.56          | 0.66          | N(C <sub>6</sub> H <sub>5</sub> ) <sub>2</sub>   | 0.00          | -0.22         | Cl                                              | 0.37          | 0.23          |
| C(O)H                                                           | 0.36          | 0.44          | N <sup>(+)</sup> (CH <sub>3</sub> ) <sub>3</sub> | 0.88          | 0.82          | Br                                              | 0.39          | 0.23          |
| COCH <sub>3</sub>                                               | 0.38          | 0.50          | N <sub>3</sub>                                   | 0.27          | 0.15          | I                                               | 0.35          | 0.28          |
|                                                                 |               |               |                                                  |               |               |                                                 |               |               |

**Table S12. Hansch Constants Used in Study.**

| Hansch-Fujita Constants ( $\pi$ ) – hydrophobicity<br>Taft Constants ( $E_s$ ) – Steric Bulk |       |       |                                                  |       |       |                                                 |       |       |
|----------------------------------------------------------------------------------------------|-------|-------|--------------------------------------------------|-------|-------|-------------------------------------------------|-------|-------|
| Substituent                                                                                  | $\pi$ | $E_s$ | Substituent                                      | $\pi$ | $E_s$ | Substituent                                     | $\pi$ | $E_s$ |
| H                                                                                            | 0     | 0     | C(O)C <sub>6</sub> H <sub>5</sub>                | 1.05  | --    | NO <sub>2</sub>                                 | -0.28 | 2.52  |
| CH <sub>3</sub>                                                                              | 0.56  | 0.55  | CO <sub>2</sub> <sup>(-)</sup>                   | -4.36 | --    | O <sup>(-)</sup>                                | -3.87 | --    |
| CF <sub>3</sub>                                                                              | 0.88  | 2.4   | CO <sub>2</sub> H                                | -0.32 | --    | OH                                              | -0.67 | 0.55  |
| CCl <sub>3</sub>                                                                             | 1.31  | 3.3   | CO <sub>2</sub> CH <sub>3</sub>                  | -0.01 | --    | OCH <sub>3</sub>                                | -0.02 | --    |
| CH <sub>2</sub> CH <sub>3</sub>                                                              | 1.02  | 1.31  | CO <sub>2</sub> CH <sub>2</sub> CH <sub>3</sub>  | 0.51  | --    | OCH <sub>2</sub> CH <sub>3</sub>                | 0.38  | --    |
| CH(CH <sub>3</sub> ) <sub>2</sub>                                                            | 1.55  | 1.71  | CO <sub>2</sub> C <sub>6</sub> H <sub>5</sub>    | 1.46  | --    | O( <i>n</i> -C <sub>4</sub> H <sub>9</sub> )    | 1.55  | --    |
| CH <sub>2</sub> CH <sub>2</sub> CH <sub>3</sub>                                              | 1.55  | 1.43  | CONH <sub>2</sub>                                | -1.49 | --    | O(C <sub>6</sub> H <sub>5</sub> )               | 2.08  | --    |
| C <sub>3</sub> H <sub>5</sub><br>(cyclopropyl)                                               | 1.14  | 2.21  | CONHCH <sub>3</sub>                              | -1.27 | --    | OCF <sub>3</sub>                                | --    | --    |
| <i>n</i> C <sub>4</sub> H <sub>9</sub>                                                       | 2.13  | 1.63  | CON(CH <sub>3</sub> ) <sub>2</sub>               | -0.71 | --    | OCOCH <sub>3</sub>                              | -0.64 | --    |
| C(CH <sub>3</sub> ) <sub>3</sub>                                                             | 1.98  | 2.78  | NH <sub>2</sub>                                  | -1.23 | 0.61  | OC(O)C <sub>6</sub> H <sub>5</sub>              | 1.46  | --    |
| <i>n</i> C <sub>5</sub> H <sub>11</sub><br>( <i>n</i> -pentyl)                               | 2.67  | --    | N <sup>(+)</sup> H <sub>3</sub>                  | -4.19 | --    | SH                                              | 0.39  | 1.07  |
| C <sub>6</sub> H <sub>5</sub>                                                                | 1.96  | 3.43  | NHCH <sub>3</sub>                                | -0.47 | --    | SCH <sub>3</sub>                                | 0.61  | 1.07  |
| <i>c</i> -C <sub>6</sub> H <sub>11</sub>                                                     | 2.51  | --    | NH(CH <sub>2</sub> CH <sub>3</sub> )             | 0.08  | --    | SCH <sub>2</sub> CH <sub>3</sub>                | 1.07  | --    |
| CH <sub>2</sub> C <sub>6</sub> H <sub>5</sub>                                                | 2.01  | 1.51  | NH(C <sub>6</sub> H <sub>5</sub> )               | 1.37  | --    | SC <sub>6</sub> H <sub>5</sub>                  | 2.32  | --    |
| CH <sub>2</sub> OCH <sub>3</sub>                                                             | -0.78 | 1.43  | NHCOCH <sub>3</sub>                              | -0.97 | 4.00  | SOCH <sub>2</sub> CH <sub>3</sub>               | -1.04 | --    |
| CH <sub>2</sub> OC <sub>6</sub> H <sub>5</sub>                                               | 1.66  | --    | NHC(O)C <sub>6</sub> H <sub>5</sub>              | 0.49  | --    | SO <sub>3</sub> <sup>(-)</sup>                  | -4.76 | --    |
| CH <sub>2</sub> NH <sub>2</sub>                                                              | -1.04 | --    | NHNH <sub>2</sub>                                | -0.88 | --    | SO <sub>2</sub> CH <sub>3</sub>                 | -1.63 | --    |
| CH <sub>2</sub> <sup>(+)</sup> NH <sub>3</sub>                                               | -4.09 | 3.54  | NHOH                                             | -1.34 | --    | SO <sub>2</sub> CH <sub>2</sub> CH <sub>3</sub> | -1.09 | --    |
| 1-pyrryl                                                                                     | 0.95  | --    | NHSO <sub>2</sub> CH <sub>3</sub>                | -1.18 | --    | SO <sub>2</sub> C <sub>6</sub> H <sub>5</sub>   | 0.27  | --    |
| 2-thienyl                                                                                    | 1.61  | --    | NHSO <sub>2</sub> C <sub>6</sub> H <sub>5</sub>  | 0.45  | --    | SO <sub>2</sub> CF <sub>3</sub>                 | 0.55  | --    |
| 3-thienyl                                                                                    | 1.81  | --    | N(CH <sub>3</sub> ) <sub>2</sub>                 | 0.18  | --    | SO <sub>2</sub> NH <sub>2</sub>                 | -1.82 | --    |
| 2-benzthiazolyl                                                                              | 2.13  | --    | N(CH <sub>2</sub> CH <sub>3</sub> ) <sub>2</sub> | 1.18  | --    | F                                               | 0.14  | 0.55  |
| CN                                                                                           | -0.57 | 0.51  | N(C <sub>6</sub> H <sub>5</sub> ) <sub>2</sub>   | 3.61  | --    | Cl                                              | 0.71  | 0.97  |
| C(O)H                                                                                        | -0.65 | --    | N <sup>(+)</sup> (CH <sub>3</sub> ) <sub>3</sub> | -5.96 | --    | Br                                              | 0.86  | 1.16  |
| COCH <sub>3</sub>                                                                            | -0.55 | --    | N <sub>3</sub>                                   | 0.46  | --    | I                                               | 1.12  | 1.62  |
|                                                                                              |       |       |                                                  |       |       |                                                 |       |       |



**Figure S2. Experimental solubility vs predicted solubility of quinolone derivative following Yalkowsky and Banerjee's solubility equation.**

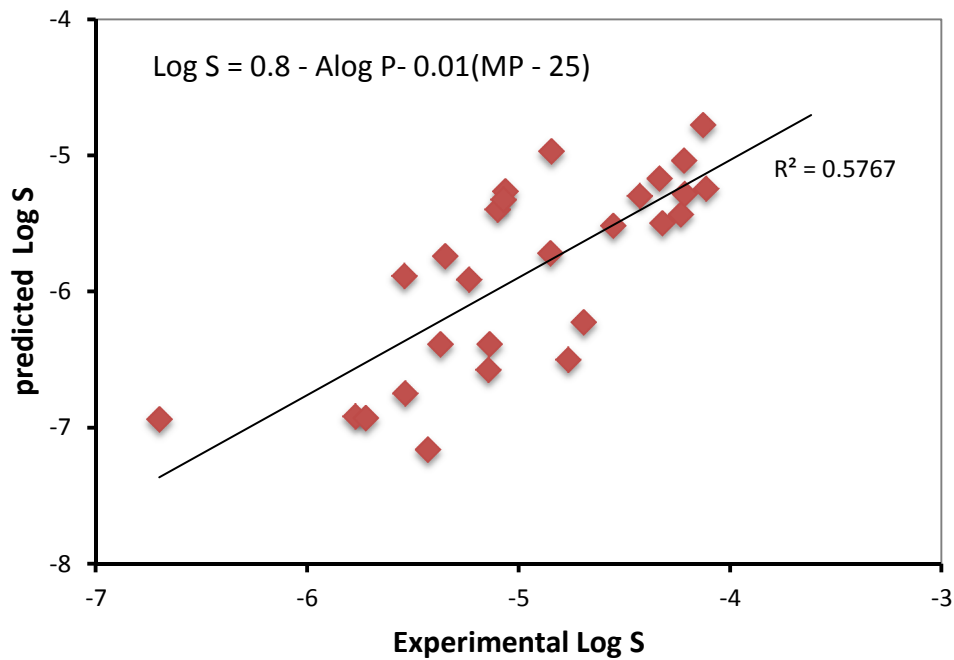

Supplement: NIHMS366011-supplement-1_si_001.pdf [file NIHMS366011-supplement-1_si_001.pdf]
